# Supplementary material for: Assisted Migration of Sequoiadendron Genotypes for Conservation and Timber: Performance and Morphology in a Warmer Climate Outside of Their Range
Source: MDPI journal article supplement (doi:10.3390/conservation3040035), 2023-12-01
Supplement: s1 [file s1]

**SUPPLEMENTAL FILE -- for “Assisted Migration of Sequoiadendron Genotypes for Conservation and Timber: Performance and Morphology in a Warmer Climate Outside of their Range” by Christopher M. Valness, William J. Libby, and John-Pascal Berrill**

Table S1. Grove characteristics of 23 giant sequoia native grove samples planted at the Foresthill Seed Orchard study site (arranged from north to south in table).

| Grove name              | Area (ha) | Region  | Lat (°) | Long (°) | Elev (m) | Adj Elev (m) |
|-------------------------|-----------|---------|---------|----------|----------|--------------|
| Foresthill Seed Orchard | -         | -       | 39.08   | 120.73   | 1280     | 1284         |
| Placer                  | 1         | North   | 39.05   | 120.57   | 1585     | 1585         |
| North Calaveras         | 24        | North   | 38.28   | 120.30   | 1400     | 1295         |
| South Calaveras         | 184       | North   | 38.25   | 120.23   | 1475     | 1365         |
| Tuolumne                | 8         | North   | 37.77   | 119.80   | 1705     | 1529         |
| Merced                  | 8         | North   | 37.75   | 119.83   | 1675     | 1497         |
| Mariposa                | 101       | North   | 37.52   | 119.60   | 1890     | 1680         |
| Nelder                  | 195       | North   | 37.45   | 119.58   | 1830     | 1611         |
| McKinley                | 22        | North   | 37.02   | 119.10   | 1950     | 1671         |
| Cabin Creek             | 40        | Central | 36.80   | 118.95   | 1660     | 1352         |
| Converse Basin          | 1498      | Central | 36.80   | 118.95   | 1755     | 1447         |
| Lockwood                | 40        | Central | 36.80   | 118.85   | 1675     | 1367         |
| Windy Gulch             | 405       | Central | 36.78   | 118.82   | 1980     | 1669         |
| Grant                   | 130       | Central | 36.75   | 118.98   | 1525     | 1210         |
| Redwood Mountain        | 1271      | Central | 36.70   | 118.92   | 1905     | 1583         |
| Giant Forest            | 855       | Central | 36.56   | 118.75   | 1905     | 1564         |
| Atwell Mill             | 383       | South   | 36.46   | 118.70   | 2135     | 1780         |
| Cedar Flat/South Fork   | 97        | South   | 36.36   | 118.70   | 1948     | 1579         |
| Mountain Home           | 1620      | South   | 36.23   | 118.68   | 1890     | 1504         |
| Wheel Meadow            | 498       | South   | 36.12   | 118.57   | 1950     | 1546         |
| Black Mountain I        | 1333      | South   | 36.10   | 118.65   | 1945     | 1543         |
| Black Mountain II       | 1333      | South   | 36.10   | 118.65   | 1950     | 1546         |
| Packsaddle              | 137       | South   | 35.93   | 118.58   | 1950     | 1523         |
| Deer Creek              | 21        | South   | 35.92   | 118.58   | 1830     | 1401         |

Table S2. Climate summary of the Foresthill study site and a subset of six native giant sequoia groves of 23 sampled at Foresthill Seed Orchard arranged by latitude from north to south for the period 1981-2009. Climate data generated from the Daymet database. Data are mean annual precipitation (Ann. Precip), mean monthly growing-season (GS = May-Sept) precipitation, mean May snow water equivalent (SWE kg m<sup>-2</sup>), mean monthly growing-season temperature (Temp), and mean monthly growing-season maximum (Max Temp) and minimum temperature (Min Temp).

| Site                    | Ann. Precip.<br>(mm) | Growing Season<br>Precip. (mm) | May SWE<br>(kg m <sup>-2</sup> ) | GS Avg.<br>Temp<br>(°C) | GS Max Temp<br>(°C) | GS Min Temp<br>(°C) |
|-------------------------|----------------------|--------------------------------|----------------------------------|-------------------------|---------------------|---------------------|
| Foresthill Seed Orchard | 1300                 | 147.3                          | 0                                | 18.3                    | 25.3                | 8.9                 |
| North Calaveras         | 1355                 | 106.3                          | 2.8                              | 16.3                    | 23.5                | 4.4                 |
| South Calaveras         | 1363                 | 107.8                          | 1.6                              | 15.8                    | 23.0                | 8.7                 |
| Converse Basin          | 990                  | 91.6                           | 28.5                             | 15.2                    | 22.5                | 8.0                 |
| Giant Forest*           | 1110                 | 79.7                           | 274.2                            | 12.8                    | 20.0                | 5.5                 |
| Atwell Mill*            | 1167                 | 77.3                           | 523.8                            | 10.6                    | 17.8                | 3.5                 |
| Mountain Home           | 929                  | 55.4                           | 125.2                            | 13.7                    | 19.0                | 7.5                 |
| Packsaddle*             | 883                  | 55.7                           | 170.8                            | 12.9                    | 21.1                | 4.8                 |

\*Daymet data estimates a higher elevation site than giant sequoia native grove data. Mean precipitation and SWE may be overestimated, while temperature data may be underestimated.

Table S3. Trial 1 SEGI steckling grove sample height (HT) in percent of within-trial steckling mean by grove sample in six measurement years from 1981 to 2009 at the Foresthill Seed Orchard. Coefficient of variation (CV) and grove sample rankings (R) included (1 = largest; 23 = smallest).

|                   | 1981 |     |    |    | 1983 |    |    |     | 1988 |    |     |    | 1991 |     |    |    | 1997 |    |    |  | 2009 |  |  |  |
|-------------------|------|-----|----|----|------|----|----|-----|------|----|-----|----|------|-----|----|----|------|----|----|--|------|--|--|--|
| Grove             | n    | HT% | CV | R  | HT%  | CV | R  | HT% | CV   | R  | HT% | CV | R    | HT% | CV | R  | HT%  | CV | R  |  |      |  |  |  |
| Placer            | 8    | 75  | 31 | 23 | 68   | 22 | 21 | 67  | 21   | 22 | 69  | 28 | 22   | 69  | 34 | 22 | 63   | 33 | 22 |  |      |  |  |  |
| North Calaveras   | 19   | 95  | 25 | 14 | 102  | 34 | 10 | 100 | 31   | 16 | 103 | 31 | 12   | 98  | 32 | 13 | 90   | 29 | 19 |  |      |  |  |  |
| South Calaveras   | 13   | 85  | 31 | 20 | 101  | 30 | 12 | 104 | 23   | 11 | 105 | 22 | 8    | 104 | 27 | 8  | 102  | 23 | 11 |  |      |  |  |  |
| Tuolumne          | 12   | 105 | 30 | 12 | 85   | 28 | 19 | 88  | 30   | 19 | 92  | 23 | 18   | 96  | 25 | 15 | 94   | 33 | 16 |  |      |  |  |  |
| Merced            | 10   | 110 | 21 | 7  | 80   | 30 | 20 | 75  | 34   | 20 | 77  | 30 | 20   | 76  | 32 | 20 | 77   | 30 | 20 |  |      |  |  |  |
| Mariposa          | 8    | 95  | 39 | 13 | 89   | 36 | 18 | 88  | 40   | 18 | 95  | 30 | 17   | 94  | 23 | 17 | 98   | 17 | 13 |  |      |  |  |  |
| Nelder            | 6    | 110 | 34 | 4  | 94   | 22 | 16 | 100 | 15   | 13 | 97  | 18 | 15   | 91  | 24 | 18 | 91   | 20 | 18 |  |      |  |  |  |
| McKinley          | 13   | 90  | 28 | 18 | 110  | 17 | 4  | 108 | 18   | 6  | 105 | 17 | 8    | 102 | 25 | 9  | 101  | 26 | 12 |  |      |  |  |  |
| Cabin Creek       | 10   | 110 | 20 | 5  | 94   | 21 | 15 | 100 | 26   | 15 | 97  | 23 | 15   | 89  | 24 | 19 | 95   | 19 | 15 |  |      |  |  |  |
| Converse Basin    | 14   | 105 | 22 | 9  | 116  | 30 | 2  | 117 | 25   | 1  | 118 | 21 | 1    | 115 | 19 | 1  | 118  | 16 | 2  |  |      |  |  |  |
| Lockwood          | 11   | 115 | 31 | 1  | 96   | 20 | 14 | 104 | 15   | 9  | 108 | 21 | 7    | 104 | 23 | 7  | 105  | 28 | 9  |  |      |  |  |  |
| Windy Gulch       | 5    | 110 | 36 | 2  | 111  | 36 | 3  | 100 | 22   | 13 | 90  | 21 | 19   | 98  | 22 | 14 | 104  | 17 | 10 |  |      |  |  |  |
| Grant             | 7    | 90  | 30 | 19 | 90   | 33 | 17 | 92  | 29   | 17 | 97  | 25 | 14   | 94  | 31 | 16 | 93   | 28 | 17 |  |      |  |  |  |
| Redwood Mtn       | 19   | 110 | 26 | 6  | 107  | 37 | 6  | 108 | 39   | 7  | 108 | 32 | 5    | 107 | 36 | 5  | 107  | 31 | 7  |  |      |  |  |  |
| Giant Forest      | 11   | 105 | 34 | 11 | 105  | 36 | 8  | 108 | 30   | 5  | 113 | 27 | 3    | 109 | 31 | 4  | 112  | 28 | 3  |  |      |  |  |  |
| Atwell Mill       | 10   | 110 | 19 | 2  | 98   | 36 | 13 | 100 | 30   | 12 | 100 | 25 | 13   | 98  | 29 | 12 | 97   | 33 | 14 |  |      |  |  |  |
| Cedar Flat        | 3    | 80  | 44 | 22 | 59   | 45 | 23 | 71  | 36   | 21 | 69  | 36 | 21   | 74  | 51 | 21 | 73   | 44 | 21 |  |      |  |  |  |
| Mountain Home     | 11   | 85  | 30 | 21 | 107  | 27 | 7  | 113 | 22   | 3  | 113 | 25 | 2    | 115 | 27 | 2  | 121  | 26 | 1  |  |      |  |  |  |
| Wheel Meadow      | 13   | 105 | 31 | 10 | 117  | 26 | 1  | 113 | 25   | 2  | 110 | 25 | 4    | 111 | 28 | 3  | 107  | 29 | 6  |  |      |  |  |  |
| Black Mountain I  | 13   | 95  | 24 | 17 | 101  | 31 | 11 | 104 | 30   | 10 | 105 | 24 | 10   | 104 | 25 | 6  | 109  | 26 | 4  |  |      |  |  |  |
| Black Mountain II | 8    | 95  | 19 | 15 | 105  | 19 | 9  | 108 | 19   | 8  | 108 | 17 | 6    | 102 | 23 | 10 | 108  | 19 | 5  |  |      |  |  |  |
| Packsaddle        | 11   | 105 | 27 | 8  | 109  | 31 | 5  | 113 | 20   | 3  | 103 | 16 | 11   | 100 | 17 | 11 | 106  | 23 | 8  |  |      |  |  |  |
| Deer Creek        | 2    | 95  | 7  | 16 | 68   | 0  | 22 | 58  | 10   | 23 | 59  | 22 | 23   | 57  | 23 | 23 | 63   | 55 | 23 |  |      |  |  |  |
| All               | 237  |     | 28 |    |      | 31 |    |     | 30   |    |     | 27 |      |     | 29 |    |      |    | 29 |  |      |  |  |  |

Table S4. Trial 1 SEGI steckling grove sample stem diameter (DBH) and volume (VOL) in percent of within-trial steckling mean by grove sample for three measurement periods from 1991 to 2009 at the Foresthill Seed Orchard. Coefficient of variation (CV) and grove sample rankings (R) included (1 = largest; 23 = smallest).

| Grove             | 1991 |      |    | 1997 |      |    | 2009 |      |    | 1991 |      |     | 1997 |      |     | 2009 |      |    |    |
|-------------------|------|------|----|------|------|----|------|------|----|------|------|-----|------|------|-----|------|------|----|----|
|                   | n    | DBH% | CV | R    | DBH% | CV | R    | DBH% | CV | R    | VOL% | CV  | R    | VOL% | CV  | R    | VOL% | CV | R  |
| Placer            | 8    | 50   | 35 | 21   | 58   | 43 | 22   | 56   | 27 | 23   | 16   | 87  | 22   | 25   | 88  | 22   | 19   | 82 | 23 |
| North Calaveras   | 19   | 107  | 39 | 7    | 95   | 35 | 17   | 88   | 22 | 20   | 112  | 76  | 8    | 92   | 93  | 12   | 71   | 63 | 19 |
| South Calaveras   | 13   | 105  | 40 | 8    | 108  | 29 | 5    | 107  | 20 | 4    | 110  | 84  | 9    | 117  | 81  | 6    | 114  | 58 | 6  |
| Tuolumne          | 12   | 89   | 46 | 19   | 94   | 32 | 18   | 93   | 28 | 18   | 75   | 88  | 18   | 83   | 88  | 16   | 86   | 85 | 17 |
| Merced            | 10   | 67   | 60 | 20   | 87   | 36 | 20   | 91   | 26 | 19   | 42   | 116 | 20   | 61   | 92  | 20   | 67   | 73 | 20 |
| Mariposa          | 8    | 93   | 51 | 17   | 98   | 29 | 12   | 102  | 18 | 11   | 90   | 106 | 15   | 85   | 76  | 14   | 95   | 46 | 13 |
| Nelder            | 6    | 102  | 37 | 10   | 95   | 29 | 15   | 96   | 16 | 16   | 90   | 73  | 16   | 79   | 75  | 18   | 76   | 47 | 18 |
| McKinley          | 13   | 124  | 27 | 1    | 105  | 21 | 8    | 101  | 13 | 13   | 131  | 52  | 3    | 101  | 69  | 8    | 95   | 49 | 12 |
| Cabin Creek       | 10   | 98   | 44 | 13   | 91   | 30 | 19   | 100  | 14 | 14   | 90   | 74  | 14   | 70   | 60  | 19   | 86   | 45 | 16 |
| Converse Basin    | 14   | 117  | 26 | 3    | 113  | 18 | 2    | 109  | 14 | 2    | 135  | 67  | 2    | 129  | 52  | 3    | 129  | 44 | 3  |
| Lockwood          | 11   | 103  | 21 | 9    | 103  | 22 | 9    | 101  | 24 | 12   | 92   | 60  | 12   | 99   | 62  | 9    | 105  | 65 | 10 |
| Windy Gulch       | 5    | 92   | 36 | 18   | 96   | 29 | 13   | 102  | 16 | 10   | 69   | 69  | 19   | 83   | 66  | 15   | 100  | 51 | 11 |
| Grant             | 7    | 96   | 49 | 15   | 108  | 37 | 4    | 109  | 23 | 3    | 93   | 88  | 11   | 115  | 89  | 7    | 110  | 72 | 9  |
| Redwood Mtn       | 19   | 101  | 44 | 11   | 107  | 31 | 6    | 104  | 22 | 8    | 116  | 105 | 7    | 128  | 89  | 4    | 114  | 63 | 5  |
| Giant Forest      | 11   | 107  | 41 | 6    | 109  | 38 | 3    | 107  | 28 | 5    | 128  | 88  | 4    | 139  | 95  | 2    | 133  | 74 | 2  |
| Atwell Mill       | 10   | 97   | 52 | 14   | 96   | 38 | 13   | 93   | 32 | 17   | 101  | 107 | 10   | 96   | 89  | 11   | 90   | 83 | 15 |
| Cedar Flat        | 3    | 45   | 63 | 22   | 70   | 47 | 21   | 84   | 31 | 21   | 17   | 132 | 21   | 43   | 122 | 21   | 52   | 89 | 21 |
| Mountain Home     | 11   | 122  | 33 | 2    | 128  | 25 | 1    | 128  | 20 | 1    | 149  | 74  | 1    | 175  | 69  | 1    | 195  | 66 | 1  |
| Wheel Meadow      | 13   | 108  | 34 | 5    | 107  | 27 | 7    | 105  | 21 | 6    | 119  | 84  | 5    | 119  | 68  | 5    | 119  | 58 | 4  |
| Black Mountain I  | 13   | 96   | 38 | 16   | 101  | 22 | 10   | 103  | 18 | 9    | 92   | 99  | 13   | 96   | 77  | 10   | 110  | 65 | 7  |
| Black Mountain II | 8    | 113  | 36 | 4    | 95   | 16 | 15   | 96   | 16 | 15   | 116  | 64  | 6    | 80   | 52  | 17   | 90   | 47 | 14 |
| Packsaddle        | 11   | 99   | 32 | 12   | 101  | 18 | 11   | 104  | 17 | 7    | 85   | 68  | 17   | 86   | 44  | 13   | 110  | 53 | 8  |
| Deer Creek        | 2    | 32   | 64 | 23   | 49   | 47 | 23   | 71   | 54 | 22   | 6    | 111 | 23   | 14   | 98  | 23   | 38   | 24 | 22 |
| All               | 237  | 100  | 41 |      | 100  | 31 |      | 100  | 24 |      | 100  | 88  |      | 100  | 83  |      | 100  | 71 |    |

Table S5. Descriptive statistics summarized for trial 2 SEGI stecklings by grove sample for height (m), diameter (cm), conic stem volume (m<sup>3</sup>), and height–diameter ratio (HDR) after 29 growing seasons at the Foresthill Seed Orchard. Grove sample rankings (R) included (1 = largest; 21 = smallest).

| Grove             | Height (m) |      |      |      |      |    | Diameter (cm) |      |      |      |    | Volume (m³) |      |      |      |    | HDR  |     |     |     |    |
|-------------------|------------|------|------|------|------|----|---------------|------|------|------|----|-------------|------|------|------|----|------|-----|-----|-----|----|
|                   | n          | Mean | s.d. | Max  | Min  | R  | Mean          | s.d. | Max  | Min  | R  | Mean        | s.d. | Max  | Min  | R  | Mean | s.d | Max | Min | R  |
| Placer            | 5          | 6.3  | 1.9  | 8.9  | 4.2  | 20 | 14.3          | 4.1  | 19.2 | 8.5  | 20 | 0.04        | 0.03 | 0.07 | 0.01 | 20 | 45   | 5.8 | 52  | 39  | 10 |
| North Calaveras   | 11         | 10   | 2.9  | 13.6 | 5.7  | 16 | 22.3          | 4.2  | 28.2 | 15.6 | 18 | 0.15        | 0.08 | 0.28 | 0.04 | 18 | 44   | 6.7 | 57  | 34  | 11 |
| South Calaveras   | 9          | 11.1 | 3.5  | 15.8 | 5.2  | 14 | 27.0          | 3.5  | 30.8 | 19.4 | 7  | 0.22        | 0.10 | 0.33 | 0.07 | 11 | 41   | 1.3 | 58  | 20  | 16 |
| Tuolumne          | 4          | 9.9  | 4.3  | 15.0 | 4.6  | 17 | 21.1          | 7.0  | 25.6 | 10.7 | 19 | 0.14        | 0.09 | 0.24 | 0.01 | 19 | 47   | 0.7 | 61  | 36  | 5  |
| Merced            | 2          | 10.6 | 1.2  | 9.7  | 11.4 | 16 | 28.5          | 2.2  | 26.9 | 30.0 | 5  | 0.23        | 0.06 | 0.18 | 0.27 | 11 | 37   | 1.4 | 36  | 38  | 20 |
| Mariposa          | 3          | 11.4 | 2.2  | 13.0 | 8.9  | 12 | 27.4          | 3.2  | 29.3 | 23.7 | 6  | 0.23        | 0.09 | 0.29 | 0.13 | 10 | 41   | 3.5 | 44  | 38  | 15 |
| Nelder            | 5          | 9.9  | 3.1  | 13.0 | 5.1  | 17 | 25.2          | 7.1  | 31.3 | 14.9 | 14 | 0.20        | 0.13 | 0.33 | 0.03 | 15 | 39   | 3.4 | 43  | 34  | 19 |
| McKinley          | 6          | 11.8 | 2.3  | 14.7 | 7.9  | 8  | 25.2          | 5.1  | 32.4 | 17.4 | 14 | 0.21        | 0.11 | 0.40 | 0.06 | 12 | 47   | 4.5 | 53  | 40  | 4  |
| Cabin Creek       | 4          | 12.2 | 3.9  | 15.7 | 7.6  | 7  | 30.3          | 9.0  | 38.0 | 19.8 | 3  | 0.35        | 0.26 | 0.58 | 0.08 | 3  | 40   | 1.5 | 42  | 38  | 17 |
| Converse Basin    | 10         | 13.9 | 4.2  | 19.9 | 7.6  | 2  | 30.7          | 0.7  | 55.1 | 16.8 | 2  | 0.44        | 0.44 | 1.58 | 0.06 | 2  | 46   | 6.5 | 56  | 34  | 7  |
| Lockwood          | 7          | 12.3 | 3.8  | 16.9 | 8.1  | 6  | 25.7          | 7.3  | 38.6 | 17.3 | 12 | 0.25        | 0.21 | 0.62 | 0.06 | 7  | 48   | 1.1 | 66  | 35  | 2  |
| Windy Gulch       | 5          | 13.1 | 1.9  | 14.8 | 10.6 | 4  | 27.0          | 3.6  | 31.3 | 22.6 | 7  | 0.26        | 0.10 | 0.37 | 0.14 | 6  | 49   | 5.7 | 58  | 43  | 1  |
| Redwood Mtn       | 8          | 13.2 | 2.2  | 16.7 | 10.4 | 3  | 27.8          | 5.0  | 35.6 | 20.7 | 5  | 0.29        | 0.14 | 0.53 | 0.13 | 5  | 48   | 6.9 | 58  | 38  | 3  |
| Giant Forest      | 3          | 12.8 | 3.7  | 16.6 | 9.3  | 5  | 29.6          | 5.8  | 35.1 | 23.5 | 4  | 0.32        | 0.20 | 0.54 | 0.13 | 4  | 43   | 4.1 | 47  | 40  | 14 |
| Atwell Mill       | 9          | 11.8 | 3.1  | 15.6 | 4.9  | 8  | 26.2          | 7.3  | 36.1 | 10.0 | 11 | 0.25        | 0.15 | 0.53 | 0.01 | 9  | 45   | 4.0 | 53  | 40  | 8  |
| Cedar Flat        | 5          | 9.9  | 2.3  | 13.4 | 7.2  | 17 | 26.5          | 3.6  | 32.3 | 22.9 | 9  | 0.19        | 0.10 | 0.37 | 0.10 | 17 | 37   | 4.2 | 42  | 31  | 20 |
| Mountain Home     | 4          | 14.3 | 3.9  | 19.7 | 10.9 | 1  | 35.5          | 5.9  | 42.9 | 28.5 | 1  | 0.51        | 0.31 | 0.95 | 0.23 | 1  | 40   | 4.4 | 46  | 36  | 18 |
| Wheel Meadow      | 10         | 10.7 | 3.8  | 15.3 | 5.5  | 15 | 24.5          | 6.5  | 33.8 | 15.2 | 17 | 0.20        | 0.15 | 0.44 | 0.03 | 13 | 43   | 7.1 | 57  | 31  | 13 |
| Black Mountain I  | 6          | 11.5 | 2.8  | 13.8 | 6.7  | 11 | 24.7          | 5.1  | 32.9 | 16.9 | 16 | 0.20        | 0.10 | 0.33 | 0.05 | 14 | 47   | 9.5 | 58  | 36  | 5  |
| Black Mountain II | 4          | 11.6 | 4.0  | 17.3 | 8.1  | 10 | 26.5          | 6.7  | 35.9 | 20.1 | 9  | 0.25        | 0.22 | 0.58 | 0.10 | 8  | 43   | 7.4 | 49  | 33  | 12 |
| Packsaddle        | 3          | 11.3 | 1.2  | 12.6 | 10.3 | 13 | 25.3          | 3.2  | 28.1 | 21.9 | 13 | 0.19        | 0.07 | 0.26 | 0.13 | 16 | 45   | 2.4 | 47  | 42  | 9  |
| All               | 123        | 11.5 | 3.4  | 19.9 | 4.2  |    | 26.1          | 6.9  | 55.1 | 8.5  |    | 0.24        | 0.20 | 1.58 | 0.01 |    | 44   | 7.2 | 66  | 20  |    |

Table S6. Trial 2 SEGI steckling grove sample height (HT) in percent of within-trial steckling mean by grove sample in six measurement years from 1981 to 2009 at the Foresthill Seed Orchard. Coefficient of variation (CV) and grove sample rankings (R) included (1 = largest; 21 = smallest).

|                   | 1981 |     |    |    | 1983 |    |    |     | 1988 |    |     |    | 1991 |     |    |    | 1997 |    |    |  | 2009 |  |  |  |
|-------------------|------|-----|----|----|------|----|----|-----|------|----|-----|----|------|-----|----|----|------|----|----|--|------|--|--|--|
| Grove             | n    | HT% | CV | R  | HT%  | CV | R  | HT% | CV   | R  | HT% | CV | R    | HT% | CV | R  | HT%  | CV | R  |  |      |  |  |  |
| Placer            | 5    | 68  | 22 | 21 | 63   | 42 | 21 | 63  | 35   | 21 | 62  | 29 | 21   | 56  | 31 | 21 | 55   | 30 | 21 |  |      |  |  |  |
| North Calaveras   | 11   | 103 | 20 | 10 | 96   | 20 | 14 | 89  | 14   | 18 | 91  | 14 | 18   | 91  | 19 | 18 | 87   | 30 | 17 |  |      |  |  |  |
| South Calaveras   | 9    | 107 | 22 | 8  | 88   | 40 | 18 | 94  | 27   | 15 | 97  | 24 | 14   | 98  | 29 | 13 | 97   | 32 | 14 |  |      |  |  |  |
| Tuolumne          | 4    | 94  | 20 | 15 | 94   | 32 | 15 | 92  | 26   | 17 | 90  | 29 | 19   | 91  | 31 | 17 | 86   | 43 | 19 |  |      |  |  |  |
| Merced            | 2    | 91  | 54 | 16 | 81   | 50 | 19 | 85  | 47   | 20 | 79  | 46 | 20   | 78  | 46 | 20 | 93   | 11 | 16 |  |      |  |  |  |
| Mariposa          | 3    | 103 | 12 | 11 | 102  | 6  | 11 | 110 | 9    | 5  | 113 | 11 | 5    | 105 | 8  | 7  | 100  | 19 | 12 |  |      |  |  |  |
| Nelder            | 5    | 91  | 19 | 16 | 105  | 28 | 8  | 101 | 30   | 12 | 94  | 26 | 17   | 90  | 30 | 19 | 87   | 31 | 18 |  |      |  |  |  |
| McKinley          | 6    | 108 | 20 | 7  | 103  | 19 | 10 | 103 | 15   | 11 | 105 | 17 | 8    | 101 | 23 | 10 | 103  | 19 | 8  |  |      |  |  |  |
| Cabin Creek       | 4    | 108 | 51 | 6  | 143  | 32 | 1  | 127 | 22   | 1  | 114 | 22 | 4    | 107 | 21 | 5  | 107  | 32 | 7  |  |      |  |  |  |
| Converse Basin    | 10   | 104 | 33 | 9  | 105  | 32 | 9  | 109 | 22   | 6  | 116 | 23 | 3    | 123 | 31 | 2  | 121  | 30 | 2  |  |      |  |  |  |
| Lockwood          | 7    | 89  | 34 | 18 | 78   | 38 | 20 | 86  | 29   | 19 | 95  | 23 | 15   | 100 | 26 | 11 | 107  | 31 | 6  |  |      |  |  |  |
| Windy Gulch       | 5    | 117 | 34 | 2  | 116  | 38 | 3  | 107 | 35   | 7  | 103 | 23 | 10   | 102 | 19 | 8  | 115  | 15 | 4  |  |      |  |  |  |
| Redwood Mtn       | 8    | 111 | 31 | 3  | 115  | 28 | 4  | 107 | 20   | 8  | 106 | 17 | 6    | 110 | 25 | 4  | 115  | 17 | 3  |  |      |  |  |  |
| Giant Forest      | 3    | 110 | 8  | 4  | 109  | 43 | 6  | 123 | 35   | 2  | 119 | 32 | 2    | 114 | 37 | 3  | 111  | 31 | 5  |  |      |  |  |  |
| Atwell Mill       | 9    | 102 | 41 | 12 | 89   | 21 | 17 | 94  | 18   | 16 | 98  | 19 | 12   | 99  | 26 | 12 | 103  | 32 | 9  |  |      |  |  |  |
| Cedar Flat        | 5    | 86  | 29 | 20 | 91   | 16 | 16 | 98  | 18   | 14 | 94  | 14 | 16   | 95  | 24 | 15 | 86   | 16 | 19 |  |      |  |  |  |
| Mountain Home     | 4    | 102 | 12 | 12 | 101  | 38 | 13 | 114 | 39   | 4  | 126 | 34 | 1    | 126 | 35 | 1  | 124  | 36 | 1  |  |      |  |  |  |
| Wheel Meadow      | 10   | 95  | 49 | 14 | 112  | 28 | 5  | 103 | 23   | 10 | 97  | 24 | 13   | 96  | 28 | 14 | 93   | 33 | 15 |  |      |  |  |  |
| Black Mountain I  | 6    | 86  | 24 | 19 | 102  | 28 | 11 | 100 | 22   | 13 | 103 | 16 | 9    | 105 | 19 | 6  | 100  | 25 | 11 |  |      |  |  |  |
| Black Mountain II | 4    | 118 | 64 | 1  | 105  | 30 | 7  | 106 | 25   | 9  | 105 | 31 | 7    | 101 | 40 | 9  | 101  | 35 | 10 |  |      |  |  |  |
| Packsaddle        | 3    | 110 | 48 | 4  | 118  | 43 | 2  | 118 | 14   | 3  | 100 | 17 | 11   | 92  | 15 | 16 | 99   | 10 | 13 |  |      |  |  |  |
| All               | 124  |     | 32 |    |      | 31 |    |     | 25   |    |     | 24 |      |     | 28 |    |      | 30 |    |  |      |  |  |  |

Table S7. Trial 2 SEGI steckling grove sample stem diameter (DBH) and volume (VOL) in percent of within-trial steckling mean by grove sample for three measurement periods from 1991 to 2009 at the Foresthill Seed Orchard. Coefficient of variation (CV) and grove sample rankings (R) included (1 = largest; 21 = smallest).

| Grove             | 1991 |      |    |    | 1997 |    |    |      | 2009 |    |      |     | 1991 |      |     |    | 1997 |    |    |  | 2009 |  |  |  |
|-------------------|------|------|----|----|------|----|----|------|------|----|------|-----|------|------|-----|----|------|----|----|--|------|--|--|--|
|                   | n    | DBH% | CV | R  | DBH% | CV | R  | DBH% | CV   | R  | VOL% | CV  | R    | VOL% | CV  | R  | VOL% | CV | R  |  |      |  |  |  |
| Placer            | 5    | 45   | 51 | 21 | 48   | 42 | 21 | 55   | 29   | 21 | 14   | 100 | 21   | 15   | 79  | 21 | 16   | 73 | 21 |  |      |  |  |  |
| North Calaveras   | 11   | 88   | 23 | 17 | 88   | 17 | 17 | 85   | 19   | 19 | 64   | 52  | 18   | 61   | 47  | 19 | 60   | 58 | 19 |  |      |  |  |  |
| South Calaveras   | 9    | 101  | 37 | 11 | 105  | 33 | 7  | 103  | 13   | 9  | 100  | 81  | 10   | 110  | 76  | 8  | 90   | 43 | 12 |  |      |  |  |  |
| Tuolumne          | 4    | 83   | 43 | 18 | 83   | 40 | 19 | 81   | 33   | 20 | 64   | 70  | 18   | 63   | 67  | 18 | 58   | 66 | 20 |  |      |  |  |  |
| Merced            | 2    | 78   | 91 | 20 | 85   | 62 | 18 | 109  | 8    | 5  | 71   | 133 | 17   | 68   | 121 | 17 | 92   | 27 | 11 |  |      |  |  |  |
| Mariposa          | 3    | 124  | 17 | 3  | 118  | 12 | 2  | 105  | 12   | 7  | 143  | 41  | 4    | 120  | 29  | 6  | 96   | 38 | 10 |  |      |  |  |  |
| Nelder            | 5    | 91   | 48 | 16 | 99   | 32 | 11 | 97   | 28   | 16 | 86   | 82  | 13   | 88   | 78  | 13 | 80   | 65 | 16 |  |      |  |  |  |
| McKinley          | 6    | 107  | 20 | 8  | 99   | 24 | 12 | 97   | 20   | 15 | 107  | 51  | 8    | 90   | 68  | 12 | 87   | 53 | 13 |  |      |  |  |  |
| Cabin Creek       | 4    | 125  | 21 | 2  | 114  | 25 | 3  | 116  | 30   | 3  | 157  | 58  | 2    | 124  | 60  | 5  | 144  | 74 | 3  |  |      |  |  |  |
| Converse Basin    | 10   | 113  | 33 | 5  | 113  | 33 | 6  | 118  | 35   | 2  | 143  | 67  | 4    | 161  | 83  | 2  | 180  | 99 | 2  |  |      |  |  |  |
| Lockwood          | 7    | 79   | 45 | 19 | 92   | 32 | 16 | 98   | 28   | 13 | 64   | 115 | 18   | 85   | 84  | 14 | 102  | 82 | 7  |  |      |  |  |  |
| Windy Gulch       | 5    | 109  | 34 | 6  | 102  | 23 | 9  | 104  | 13   | 8  | 121  | 72  | 6    | 95   | 54  | 10 | 106  | 37 | 6  |  |      |  |  |  |
| Redwood Mtn       | 8    | 109  | 23 | 7  | 113  | 21 | 5  | 107  | 18   | 6  | 107  | 50  | 8    | 129  | 74  | 4  | 116  | 48 | 5  |  |      |  |  |  |
| Giant Forest      | 3    | 119  | 27 | 4  | 113  | 30 | 4  | 113  | 20   | 4  | 150  | 66  | 3    | 139  | 69  | 3  | 131  | 63 | 4  |  |      |  |  |  |
| Atwell Mill       | 9    | 99   | 33 | 12 | 101  | 33 | 10 | 100  | 28   | 12 | 93   | 55  | 12   | 100  | 76  | 9  | 101  | 60 | 9  |  |      |  |  |  |
| Cedar Flat        | 5    | 99   | 30 | 13 | 95   | 28 | 15 | 101  | 14   | 11 | 86   | 70  | 13   | 83   | 79  | 15 | 79   | 53 | 18 |  |      |  |  |  |
| Mountain Home     | 4    | 142  | 29 | 1  | 143  | 19 | 1  | 136  | 17   | 1  | 243  | 82  | 1    | 229  | 65  | 1  | 209  | 61 | 1  |  |      |  |  |  |
| Wheel Meadow      | 10   | 101  | 33 | 10 | 99   | 31 | 12 | 94   | 27   | 18 | 100  | 71  | 10   | 93   | 70  | 11 | 83   | 74 | 14 |  |      |  |  |  |
| Black Mountain I  | 6    | 95   | 17 | 15 | 97   | 16 | 14 | 95   | 21   | 17 | 79   | 48  | 15   | 83   | 37  | 15 | 81   | 48 | 15 |  |      |  |  |  |
| Black Mountain II | 4    | 106  | 38 | 9  | 104  | 35 | 8  | 102  | 25   | 10 | 121  | 88  | 6    | 112  | 99  | 7  | 102  | 90 | 7  |  |      |  |  |  |
| Packsaddle        | 3    | 96   | 18 | 14 | 82   | 8  | 20 | 97   | 12   | 14 | 79   | 51  | 15   | 51   | 32  | 20 | 80   | 34 | 17 |  |      |  |  |  |
| All               | 124  |      | 34 |    | 31   |    |    | 26   |      |    | 80   |     |      | 82   |     |    | 82   |    |    |  |      |  |  |  |

Table S8. Descriptive statistics summarized for SEGI seedling tree height (m) in six measurement years from 1981–2009 by six SEGI seedling grove samples planted in trial 1 at the Foresthill Seed Orchard.

| Grove           | Height 1981 |      |      |      |      | Height 1983 |      |      |      | Height 1988 |      |      |      |
|-----------------|-------------|------|------|------|------|-------------|------|------|------|-------------|------|------|------|
|                 | n           | Mean | s.d. | Max  | Min  | Mean        | s.d. | Max  | Min  | Mean        | s.d. | Max  | Min  |
| North Calaveras | 14          | 0.22 | 0.06 | 0.33 | 0.13 | 0.93        | 0.24 | 1.41 | 0.54 | 2.8         | 0.57 | 4.2  | 1.6  |
| Redwood Mtn     | 13          | 0.22 | 0.07 | 0.36 | 0.14 | 1.08        | 0.38 | 1.98 | 0.59 | 3.1         | 0.75 | 4.5  | 1.6  |
| Giant Forest    | 14          | 0.21 | 0.05 | 0.30 | 0.15 | 1.08        | 0.24 | 1.46 | 0.60 | 3.0         | 0.48 | 3.9  | 2.3  |
| Cedar Flat      | 13          | 0.16 | 0.04 | 0.25 | 0.12 | 0.94        | 0.31 | 1.61 | 0.44 | 3.1         | 0.79 | 4.6  | 1.7  |
| Garfield        | 11          | 0.20 | 0.05 | 0.31 | 0.14 | 0.94        | 0.25 | 1.38 | 0.62 | 2.8         | 0.64 | 3.9  | 1.8  |
| Mountain Home   | 14          | 0.22 | 0.08 | 0.42 | 0.13 | 0.99        | 0.33 | 1.38 | 0.38 | 2.8         | 0.70 | 3.7  | 1.4  |
| Overall Mean    | 79          | 0.21 | 0.06 | 0.42 | 0.12 | 0.99        | 0.29 | 1.98 | 0.38 | 2.9         | 0.65 | 4.6  | 1.4  |
| Grove           | Height 1991 |      |      |      |      | Height 1997 |      |      |      | Height 2009 |      |      |      |
|                 | n           | Mean | s.d. | Max  | Min  | Mean        | s.d. | Max  | Min  | Mean        | s.d. | Max  | Min  |
| North Calaveras | 14          | 4.7  | 0.88 | 6.4  | 2.8  | 6.9         | 1.6  | 10.0 | 4.3  | 11.8        | 2.5  | 16.7 | 8.2  |
| Redwood Mtn     | 13          | 5.2  | 1.25 | 8.0  | 3.0  | 8.0         | 1.9  | 11.2 | 4.2  | 14.0        | 3.4  | 19.6 | 7.9  |
| Giant Forest    | 14          | 4.8  | 0.58 | 6.0  | 4.2  | 7.3         | 1.3  | 9.5  | 5.7  | 13.1        | 2.4  | 17.5 | 9.9  |
| Cedar Flat      | 13          | 5.0  | 1.22 | 6.6  | 2.9  | 7.2         | 1.9  | 9.8  | 4.3  | 12.7        | 2.9  | 16.7 | 7.8  |
| Garfield        | 11          | 4.7  | 0.75 | 5.9  | 3.5  | 7.2         | 1.2  | 9.0  | 5.6  | 13.8        | 2.6  | 19.9 | 10.9 |
| Mountain Home   | 14          | 4.5  | 0.85 | 5.1  | 2.3  | 7.0         | 1.3  | 8.5  | 3.8  | 12.8        | 2.4  | 15.3 | 7.8  |
| All             | 79          | 4.8  | 0.95 | 8.0  | 2.3  | 7.2         | 1.5  | 11.2 | 3.8  | 13.0        | 2.7  | 19.9 | 7.8  |



Table S9. Descriptive statistics summarized for SEGI seedling diameter at breast height (cm) and volume (m<sup>3</sup>) in three measurement years from 1991–2009 by six SEGI seedling grove samples planted in trial 1 at the Foresthill Seed Orchard.

| Grove           | Diameter 1991 |      |      |      |     | Diameter 1997 |      |      |      | Diameter 2009 |      |      |      |
|-----------------|---------------|------|------|------|-----|---------------|------|------|------|---------------|------|------|------|
|                 | n             | Mean | s.d. | Max  | Min | Mean          | s.d. | Max  | Min  | Mean          | s.d. | Max  | Min  |
| North Calaveras | 14            | 11.9 | 3.7  | 21.5 | 5.2 | 19.4          | 4.1  | 29.0 | 14.0 | 30.3          | 6.2  | 42.8 | 22.2 |
| Redwood Mtn     | 13            | 13.6 | 3.9  | 21.0 | 5.5 | 22.7          | 4.6  | 29.0 | 11.0 | 34.9          | 7.5  | 43.5 | 18.7 |
| Giant Forest    | 14            | 12.4 | 2.4  | 15.4 | 8.9 | 21.9          | 3.7  | 28.0 | 14.0 | 33.1          | 5.7  | 40.1 | 24.1 |
| Cedar Flat      | 13            | 13.1 | 4.4  | 19.2 | 4.0 | 20.9          | 5.3  | 29.0 | 9.0  | 32.7          | 6.6  | 41.0 | 15.6 |
| Garfield        | 11            | 12.2 | 3.4  | 17.3 | 7.3 | 20.0          | 3.5  | 26.0 | 16.0 | 32.0          | 5.6  | 41.1 | 24.2 |
| Mountain Home   | 14            | 11.2 | 4.1  | 16.8 | 3.2 | 19.5          | 4.3  | 25.0 | 11.0 | 31.7          | 6.9  | 40.9 | 17.9 |
| Overall Mean    | 79            | 12.4 | 3.7  | 21.5 | 3.2 | 20.7          | 4.4  | 29.0 | 9.0  | 32.4          | 6.4  | 43.5 | 15.6 |

  

| Grove           | Volume 1991 |      |      |      |      | Volume 1997 |      |      |      | Volume 2009 |      |      |      |
|-----------------|-------------|------|------|------|------|-------------|------|------|------|-------------|------|------|------|
|                 | n           | Mean | s.d. | Max  | Min  | Mean        | s.d. | Max  | Min  | Mean        | s.d. | Max  | Min  |
| North Calaveras | 14          | 0.02 | 0.02 | 0.08 | 0.00 | 0.08        | 0.05 | 0.22 | 0.02 | 0.31        | 0.18 | 0.74 | 0.13 |
| Redwood Mtn     | 13          | 0.03 | 0.02 | 0.09 | 0.00 | 0.12        | 0.06 | 0.25 | 0.01 | 0.50        | 0.27 | 0.91 | 0.07 |
| Giant Forest    | 14          | 0.02 | 0.01 | 0.04 | 0.01 | 0.10        | 0.05 | 0.20 | 0.03 | 0.40        | 0.18 | 0.71 | 0.18 |
| Cedar Flat      | 13          | 0.03 | 0.02 | 0.06 | 0.00 | 0.10        | 0.06 | 0.21 | 0.01 | 0.39        | 0.20 | 0.73 | 0.05 |
| Garfield        | 11          | 0.02 | 0.01 | 0.04 | 0.00 | 0.08        | 0.04 | 0.15 | 0.04 | 0.40        | 0.22 | 0.88 | 0.19 |
| Mountain Home   | 14          | 0.02 | 0.01 | 0.04 | 0.00 | 0.08        | 0.04 | 0.14 | 0.01 | 0.37        | 0.18 | 0.64 | 0.07 |
| All             | 79          | 0.02 | 0.02 | 0.09 | 0.00 | 0.09        | 0.05 | 0.25 | 0.01 | 0.39        | 0.21 | 0.91 | 0.05 |

Table S10. Descriptive statistics summarized by six SEGI seedling grove samples in trial 1 for lower stem form traits fluting (FLUT), asymmetry (ASYM), and basal swelling (SWEL), plus crown fullness (FULL) and epicormic sprouting (EPI) after 29 growing seasons at the Foresthill Seed Orchard in 2009. Traits scored on a scale of 0–3.

| Grove           | FLUT |      |      |     |     | ASYM |      |     |     | SWEL |      |     |     |
|-----------------|------|------|------|-----|-----|------|------|-----|-----|------|------|-----|-----|
|                 | n    | Mean | s.d. | Max | Min | Mean | s.d. | Max | Min | Mean | s.d. | Max | Min |
| North Calaveras | 14   | 0.9  | 0.7  | 2   | 0   | 2.0  | 0.7  | 3   | 1   | 2.4  | 0.5  | 3   | 2   |
| Redwood Mtn     | 13   | 1.4  | 1.1  | 3   | 0   | 2.0  | 1.2  | 3   | 0   | 1.9  | 0.8  | 3   | 1   |
| Giant Forest    | 14   | 1.9  | 1.1  | 3   | 0   | 2.2  | 1.1  | 3   | 0   | 1.9  | 0.6  | 3   | 1   |
| Cedar Flat      | 13   | 1.4  | 1.0  | 3   | 0   | 2.2  | 0.8  | 3   | 1   | 1.6  | 0.7  | 3   | 1   |
| Garfield        | 11   | 1.1  | 1.1  | 3   | 0   | 1.8  | 1.0  | 3   | 0   | 1.4  | 0.5  | 2   | 1   |
| Mountain Home   | 14   | 1.3  | 1.3  | 3   | 0   | 2.1  | 1.0  | 3   | 0   | 1.7  | 0.6  | 3   | 1   |
| Overall Mean    | 79   | 1.3  | 1.1  | 3   | 0   | 2.1  | 0.9  | 3   | 0   | 1.8  | 0.7  | 3   | 1   |

  

| Grove           | FULL |      |      |     |     | EPI  |      |     |     |
|-----------------|------|------|------|-----|-----|------|------|-----|-----|
|                 | n    | Mean | s.d. | Max | Min | Mean | s.d. | Max | Min |
| North Calaveras | 14   | 1.4  | 0.94 | 3   | 0   | 0.1  | 0.3  | 1   | 0   |
| Redwood Mtn     | 13   | 1.2  | 0.73 | 2   | 0   | 0.2  | 0.6  | 2   | 0   |
| Giant Forest    | 14   | 1.6  | 0.85 | 3   | 0   | 0.0  | 0.0  | 0   | 0   |
| Cedar Flat      | 13   | 1.8  | 0.99 | 3   | 0   | 0.2  | 0.8  | 3   | 0   |
| Garfield        | 11   | 0.9  | 0.70 | 2   | 0   | 0.3  | 0.5  | 1   | 0   |
| Mountain Home   | 14   | 1.0  | 1.04 | 3   | 0   | 0.1  | 0.3  | 1   | 0   |
| All             | 79   | 1.3  | 0.92 | 3   | 0   | 0.1  | 0.5  | 3   | 0   |

### Field layout:

The Foresthill giant sequoia experiments are independently randomized replications that are interlocked, having plot members arranged noncontiguously within each block. It gives a high degree of genetic dissimilarity between neighboring trees, which, it is argued, reflects the interactions normally found in forest stands and plantations between neighboring trees (Libby and Cockerham, 1980). The design provides for two systematic thinning operations as the experiment ages; removing one of the three interlocked replicates (A, B, or C shown below in Figure S1).

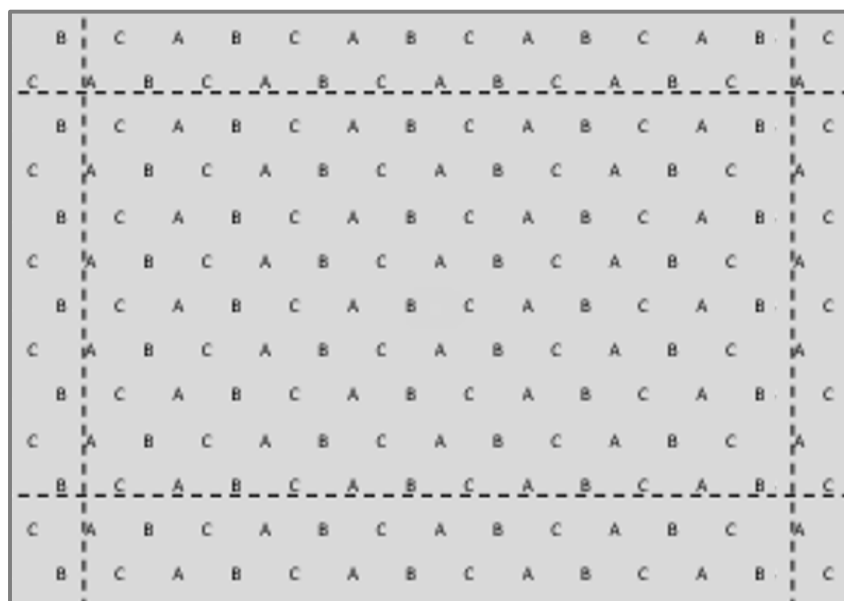

Figure S1: Schematic diagram of interlocked design with interlocking replicates A, B, and C within each block, where trees are planted at each letter in a triangle spacing, having six equidistant neighbors. Planned thinning operations remove one interlocked replicate (e.g., systematically cut all “C” trees”), leaving all genotypes represented at “A” and “B” locations, consistently leaving three equidistant neighbors to maintain evenness of growing space allocated among residual trees. The next thinning would remove, for example, “B” trees, leaving all genotypes represented at the “A” locations and maintaining an equal number and spacing of neighbor trees for evenness of growing space allocated among residual trees after thinning. After the trees reach reproductive maturity, the final thinning can be a roguing to remove less-desirable genotypes, leaving trees that are more desirable as a seed orchard for improved stock. Two buffer rows maintain evenness of spacing for trees inside the experiment before thinning and are thinned to the same pattern as the interior trees.

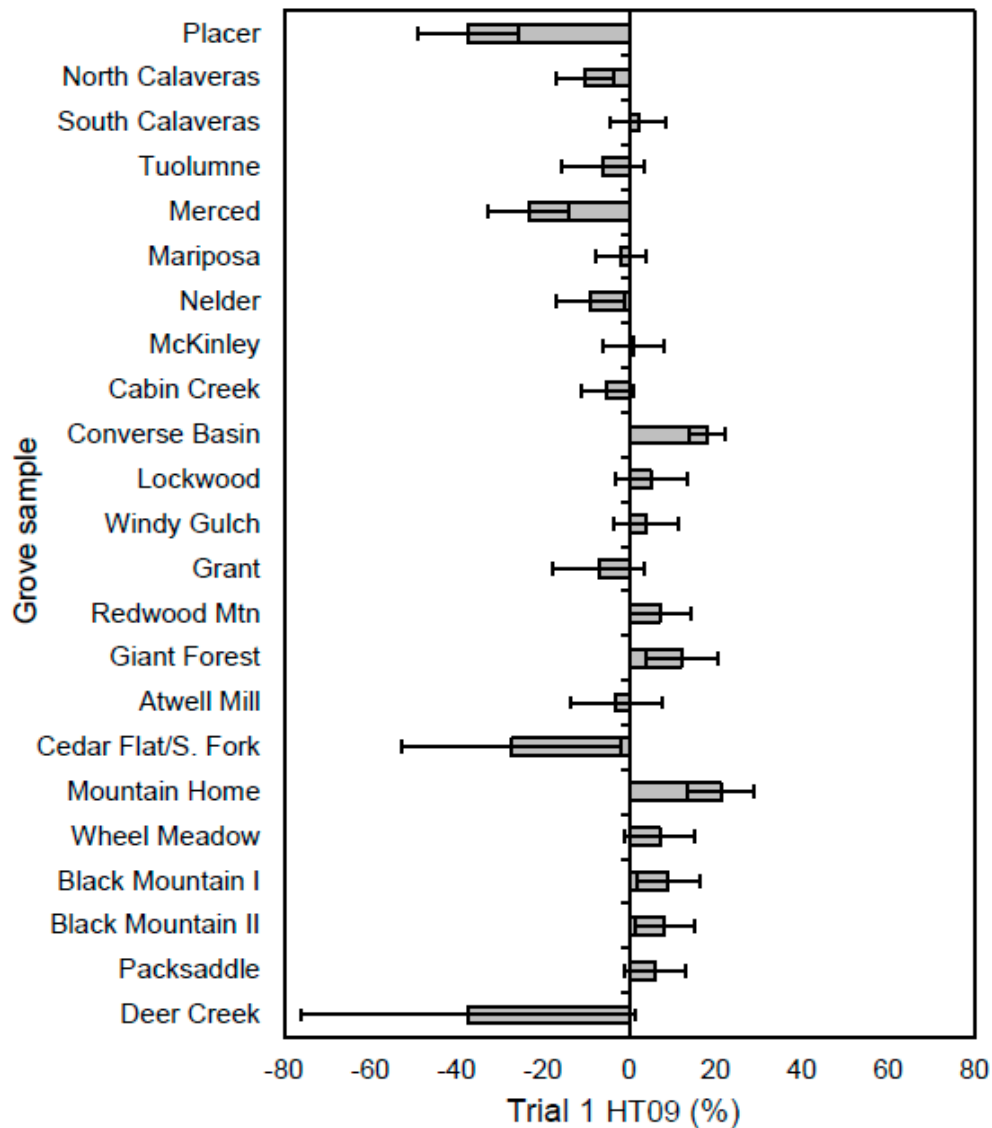

Figure S2. Trial 1 SEGI steckling grove sample mean height (HT09) in percent above or below the steckling mean after 29 growing seasons at the Foresthill Seed Orchard as of 2009. Among-grove differences were statistically significant ( $p \leq 0.05$ ) in a Kruskal–Wallis test. Placer and Deer Creek grove samples were not included in the analysis. Error bars are relative standard errors of the grove sample mean, where the grove sample standard error is divided by the mean and expressed as a percent (%). Grove samples are arranged from north to south in the figure.

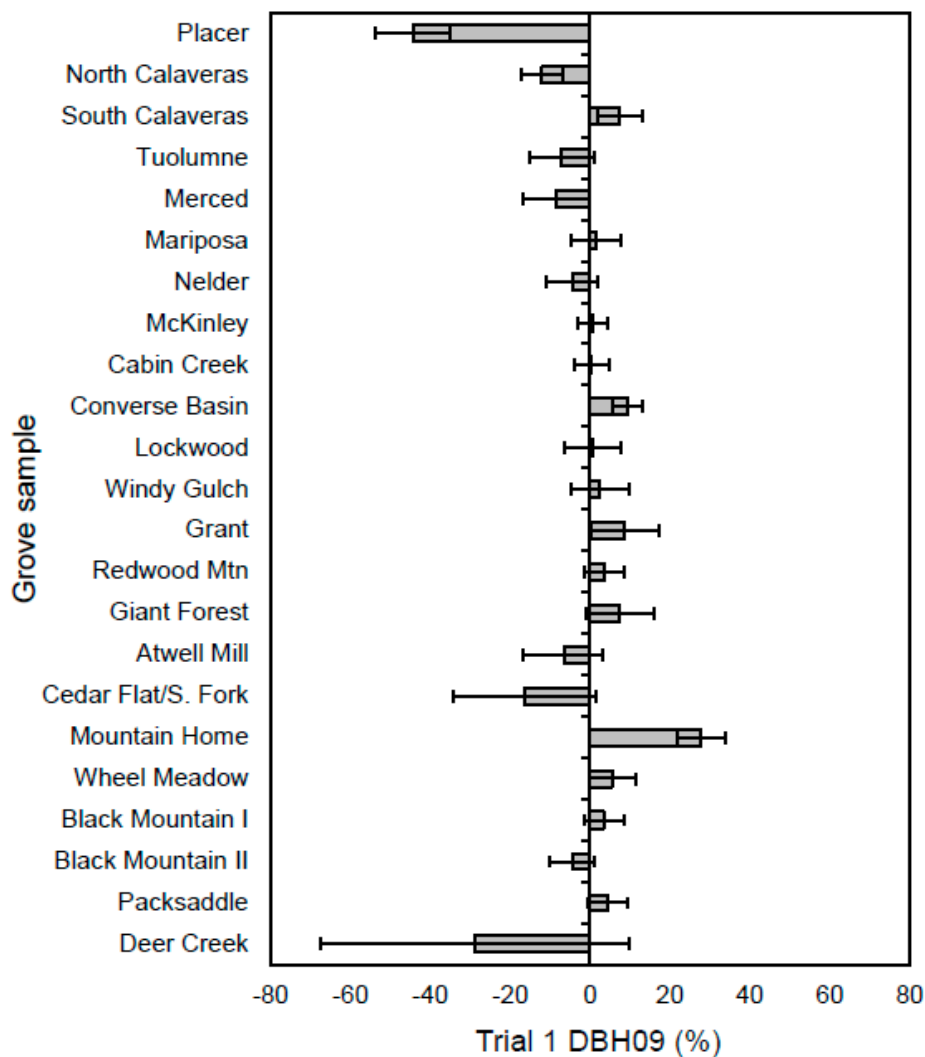

Figure S3. Trial 1 SEGI steckling grove sample mean diameter at breast height (DBH09) in percent above or below the steckling mean after 29 growing seasons at the Foresthill Seed Orchard as of 2009. Among-grove differences were statistically significant ( $p \leq 0.1$ ) in a Kruskal–Wallis test at  $\alpha = 0.1$ . Placer and Deer Creek grove samples were not included in the analysis. Error bars are relative standard errors of the grove sample mean, where the grove sample standard error is divided by the mean and expressed as a percent (%). Grove samples are arranged from north to south in the figure.

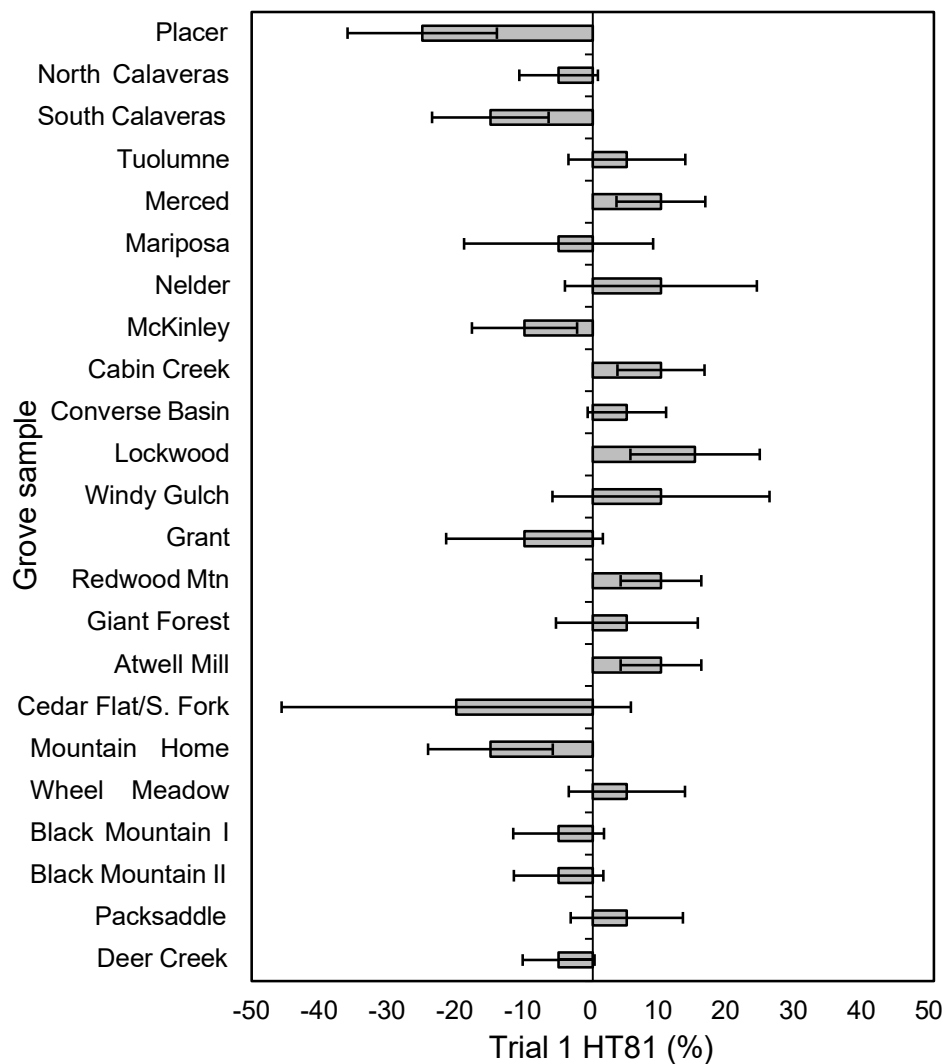

Figure S4. Trial 1 SEGI steckling grove sample mean height (HT81) in percent above or below the steckling mean after one growing season at the Foresthill Seed Orchard as of 1981. Error bars are relative standard errors of the grove sample mean, where the grove sample standard error is divided by the mean and expressed as a percent (%). Grove samples are arranged from north to south in the figure.

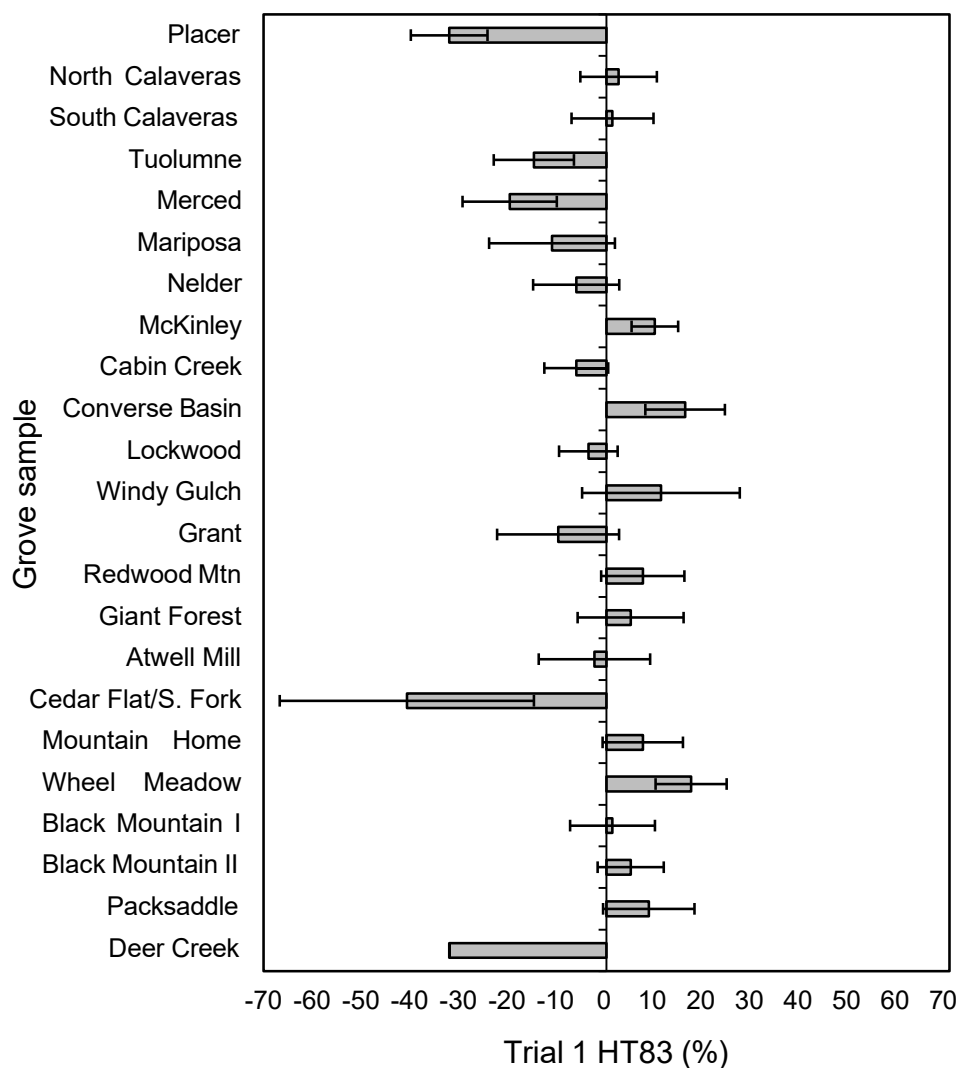

Figure S5. Trial 1 SEGI steckling grove sample mean height (HT83) in percent above or below the steckling mean after three growing seasons at the Foresthill Seed Orchard as of 1983. Error bars are relative standard errors of the grove sample mean, where the grove sample standard error is divided by the mean and expressed as a percent (%). Grove samples are arranged from north to south in the figure.

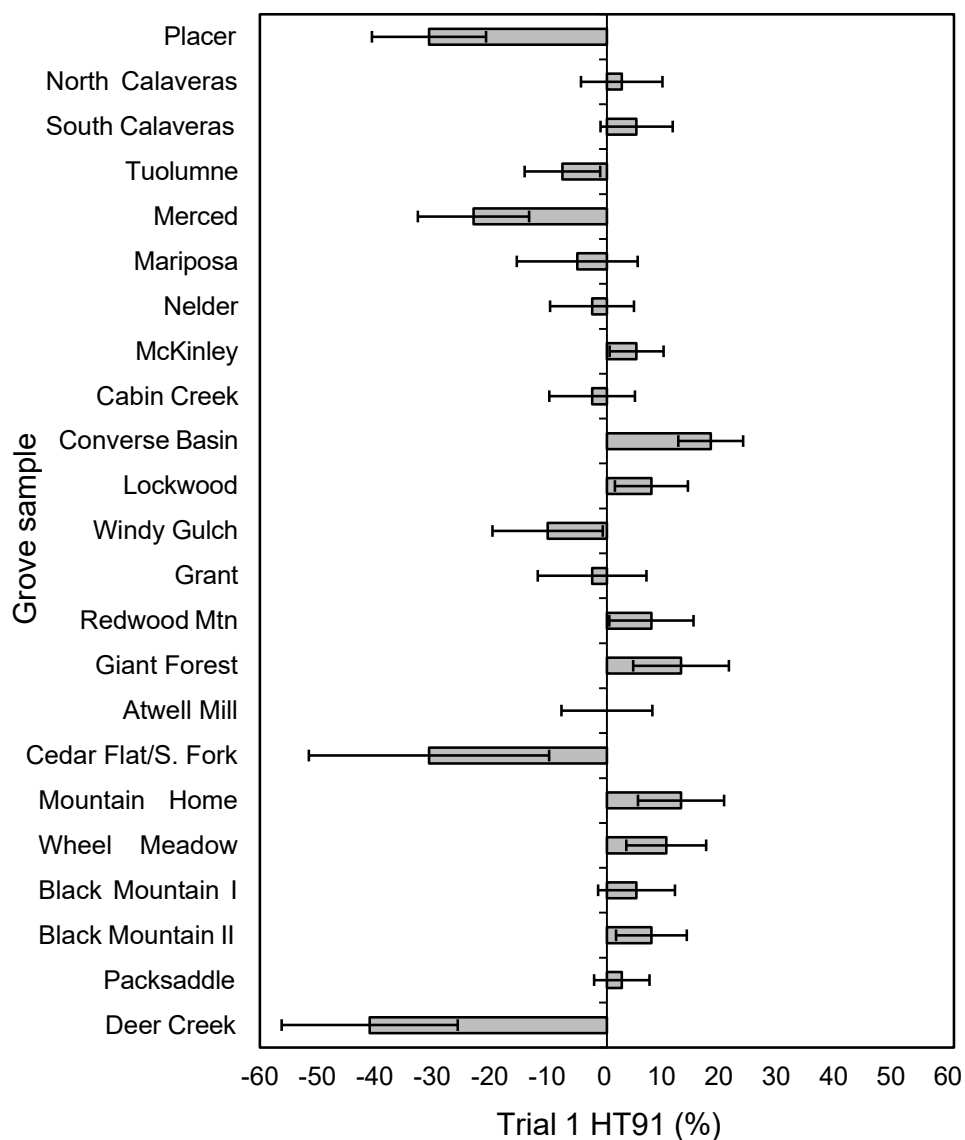

Figure S6. Trial 1 SEGI steckling grove sample mean height (HT91) in percent above or below the steckling mean after eleven growing seasons at the Foresthill Seed Orchard as of 1991. Error bars are relative standard errors of the grove sample mean, where the grove sample standard error is divided by the mean and expressed as a percent (%). Grove samples are arranged from north to south in the figure.



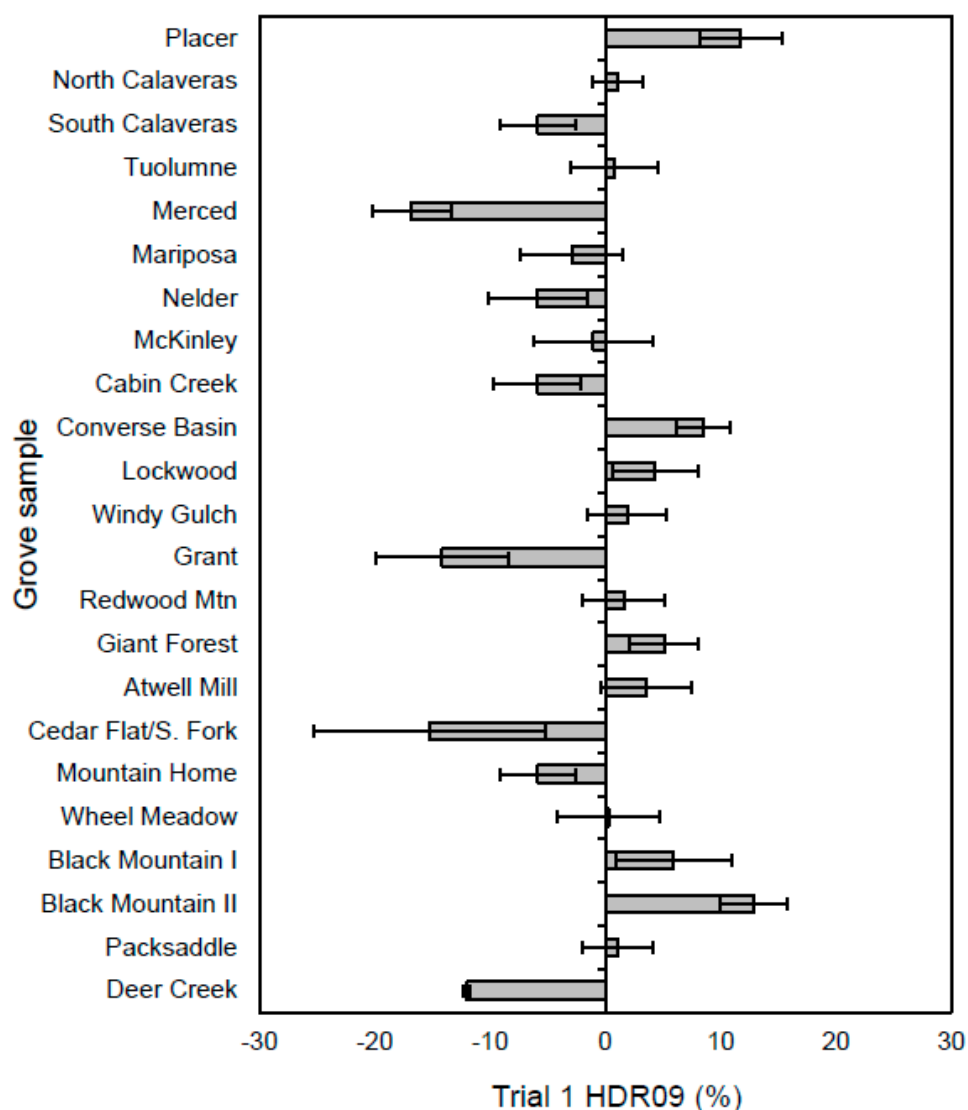

Figure S7. Trial 1 SEGI steckling grove sample mean height–diameter ratio (HDR) in percent above or below the within-trial steckling mean after 29 growing seasons at Foresthill Seed Orchard as of 2009. Among-grove differences were statistically significant ( $p \leq 0.0001$ ) in a Kruskal–Wallis one-way ANOVA. Placer and Deer Creek grove samples were not included in the analysis. Error bars are relative standard errors of the grove sample mean, where the grove sample standard error is divided by the mean and expressed as a percent (%). Grove samples are arranged from north to south in the figure.

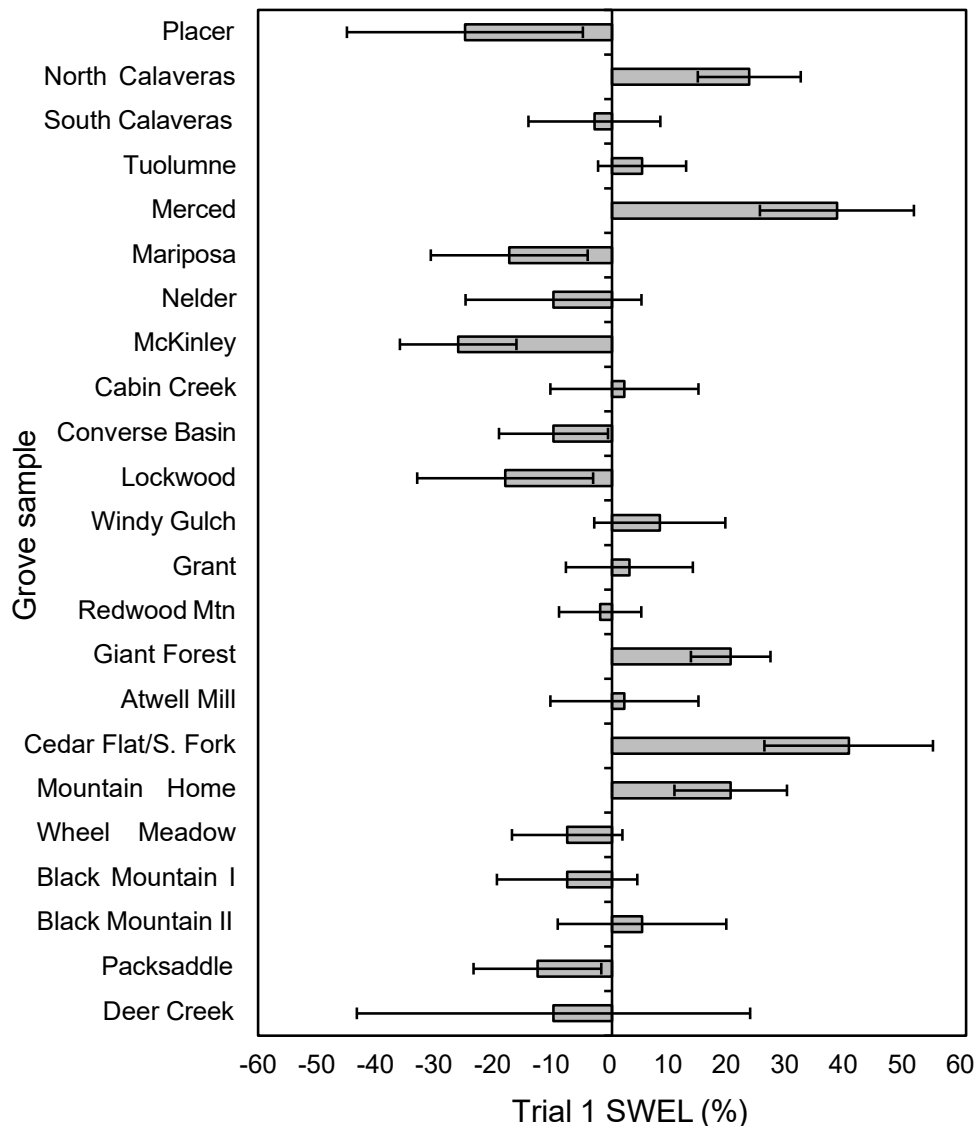

Figure S8. Trial 1 SEGI steckling grove sample basal swelling (SWEL) in percent above or below the steckling mean at the Foresthill Seed Orchard after 29 growing seasons. Among-grove differences were statistically significant ( $p \leq 0.01$ ) in a Kruskal–Wallis one-way ANOVA. Placer and Deer Creek grove samples were not included in the analysis. Error bars are relative standard errors of the grove sample mean, where the grove sample standard error is divided by the mean and expressed as a percent (%). Grove samples are arranged from north to south in the figure.

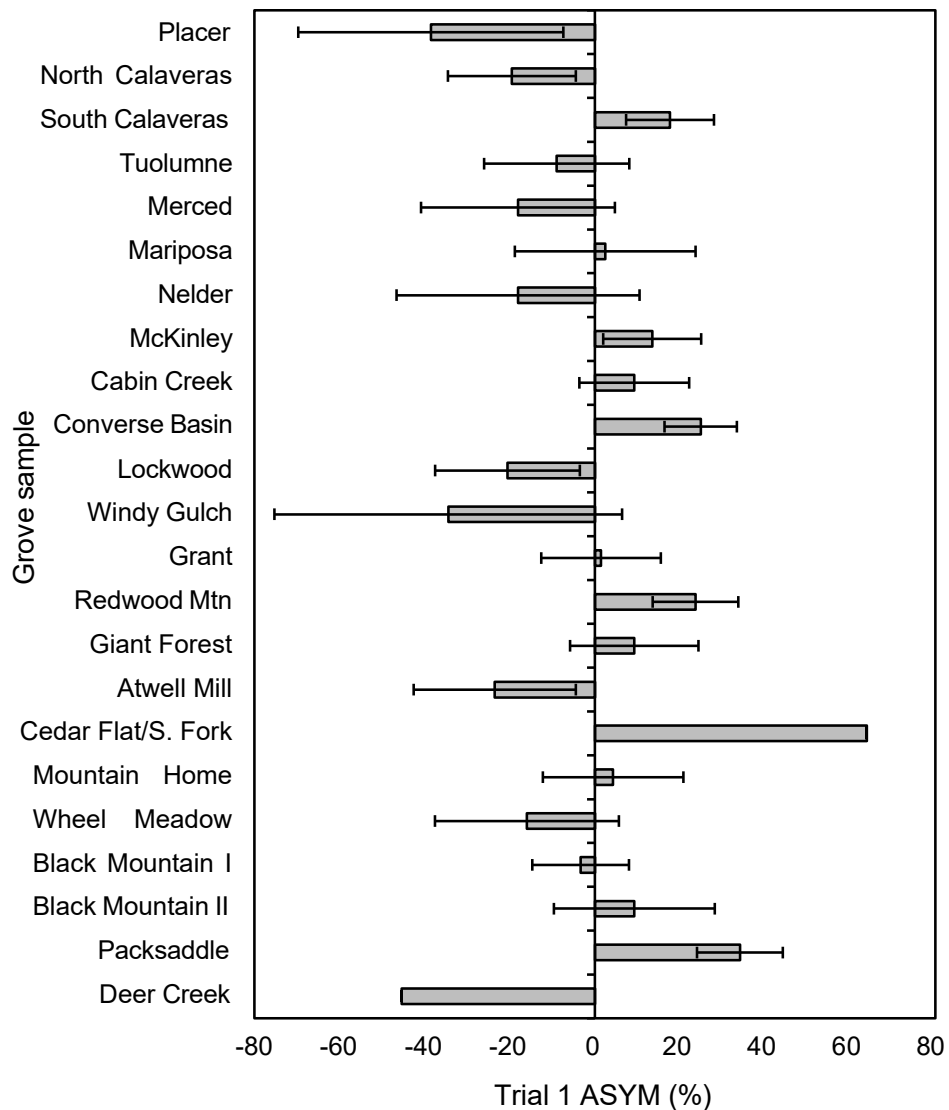

Figure S9. Trial 1 SEGI steckling grove sample lower stem asymmetry (ASYM) in percent above or below the overall mean at the Foresthill Seed Orchard after 29 growing seasons. Among-grove differences were moderately significant ( $p \leq 0.1$ ) in a Kruskal–Wallis one-way ANOVA. Placer and Deer Creek grove samples were not included in the analysis. Error bars are relative standard errors of the grove sample mean, where the grove sample standard error is divided by the mean and expressed as a percent (%). Grove samples are arranged from north to south in the figure.

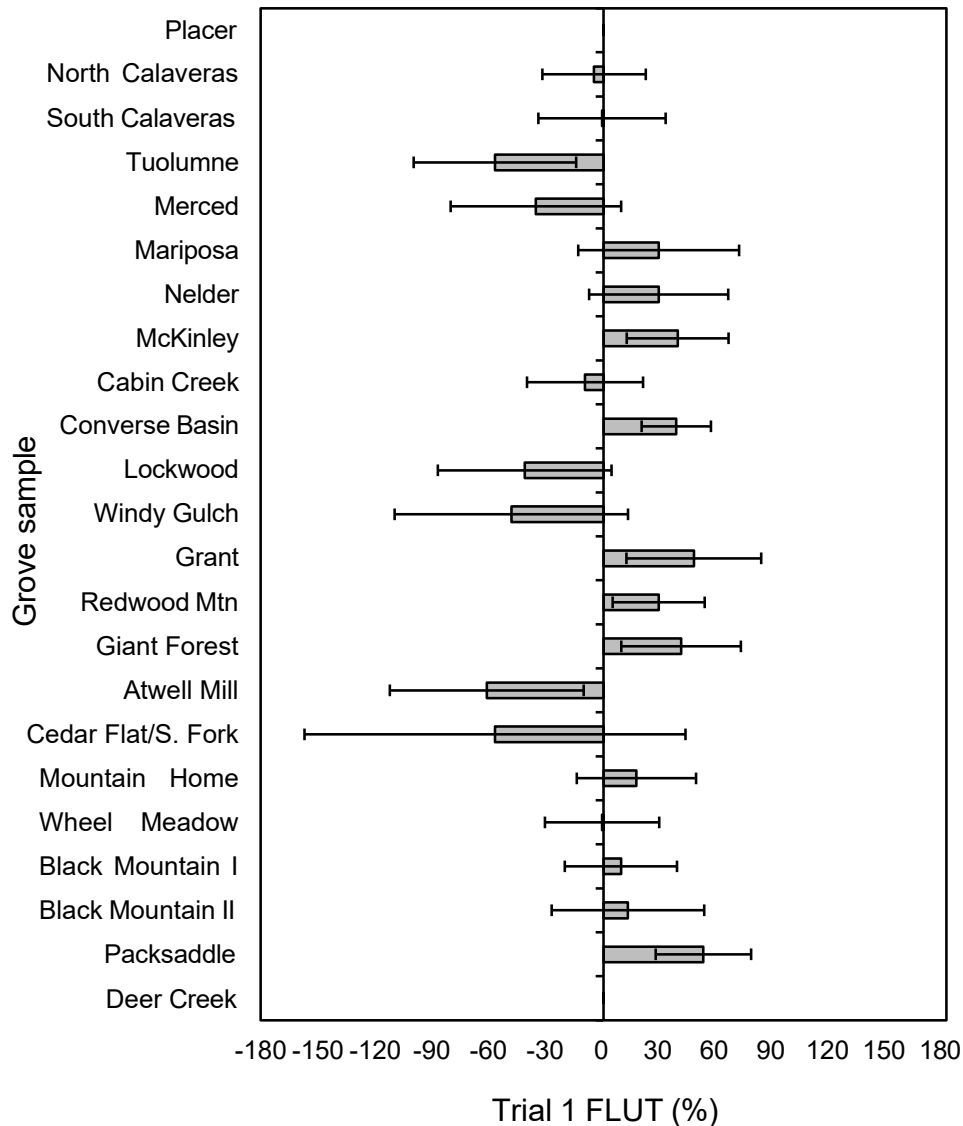

Figure S10. Trial 1 SEGI steckling grove sample lower stem fluting (FLUT) in percent above or below the overall mean at the Foresthill Seed Orchard after 29 growing seasons. There was no FLUT observed in Placer or Deer Creek grove samples. Error bars are relative standard errors of the grove sample mean, where the grove sample standard error is divided by the mean and expressed as a percent (%). Grove samples are arranged from north to south in the figure.

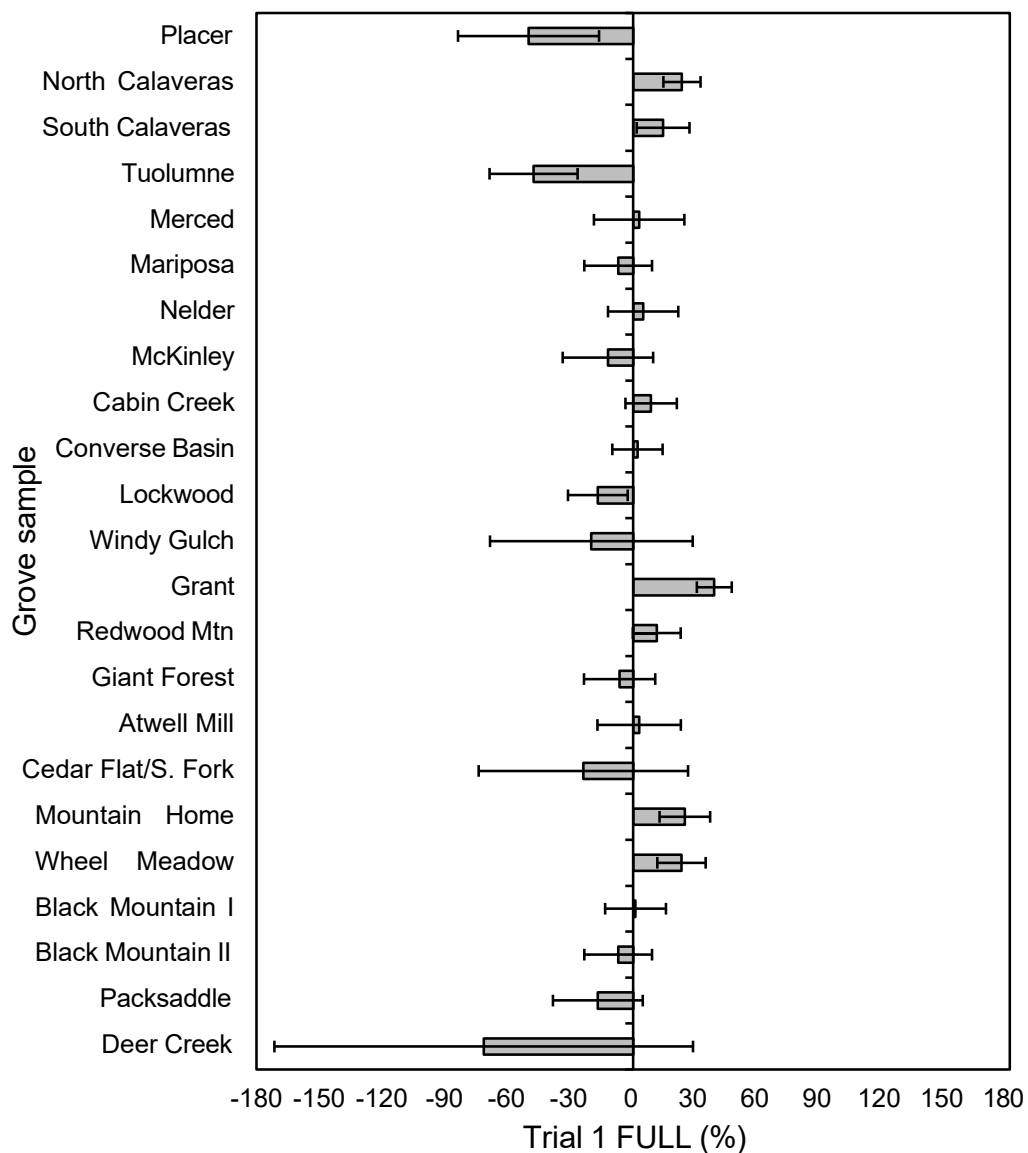

Figure S11. Trial 1 SEGI steckling grove sample crown fullness (FULL) in % above or below the overall steckling mean at the Foresthill Seed Orchard after 29 growing seasons. Error bars are relative standard errors of the grove sample mean, where the grove sample standard error is divided by the mean and expressed as a percent (%). Grove samples are arranged from north to south in the figure.

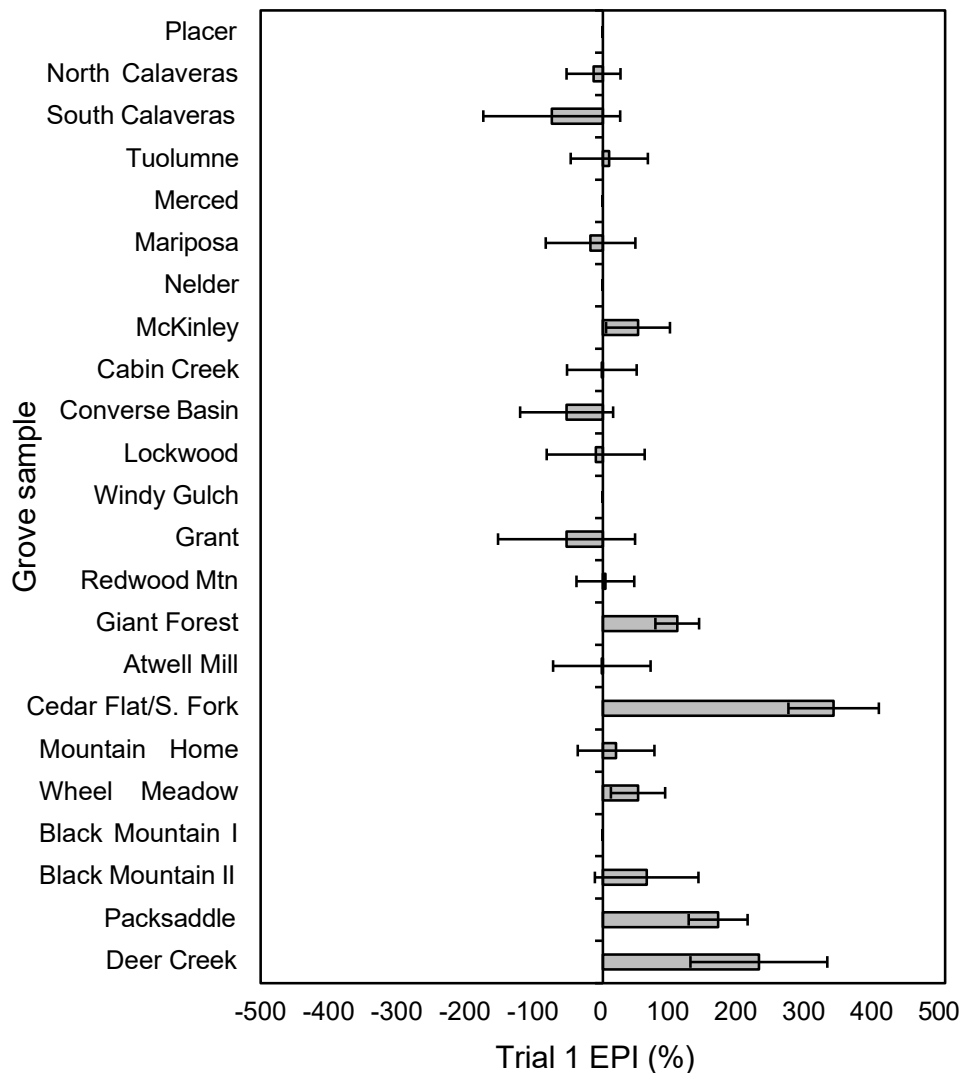

Figure S12. Trial 1 SEGI steckling grove sample epicormic sprouting abundance (EPI) in percent above or below the overall mean at the Foresthill Seed Orchard after 29 growing seasons. There were no epicormic sprouts recorded for Placer, Merced, Nelder, Windy Gulch, or Black Mountain I grove samples. Among-grove differences were statistically significant ( $p \leq 0.1$ ) in a Kruskal–Wallis test at alpha = 0.1. Error bars are relative standard errors of the grove sample mean, where the grove sample standard error is divided by the mean and expressed as a percent (%). Grove samples are arranged from north to south in the figure.

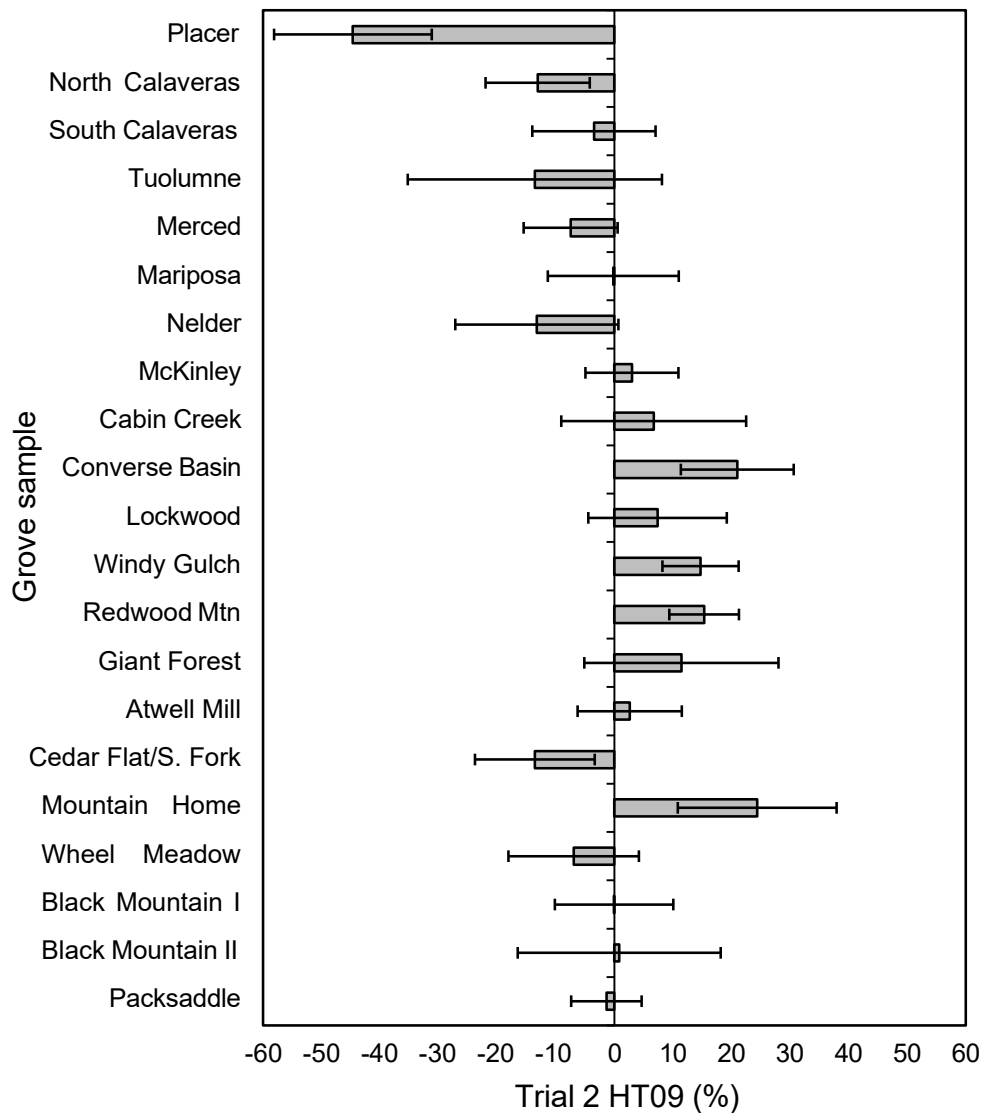

Figure S13. Trial 2 SEGI steckling grove sample mean height (HT09) in percent above or below the steckling mean after 29 growing seasons at the Foresthill Seed Orchard as of 2009. Error bars are relative standard errors (%). Error bars are relative standard errors of the grove sample mean, where the grove sample standard error is divided by the mean and expressed as a percent (%). Grove samples are arranged from north to south in the figure.

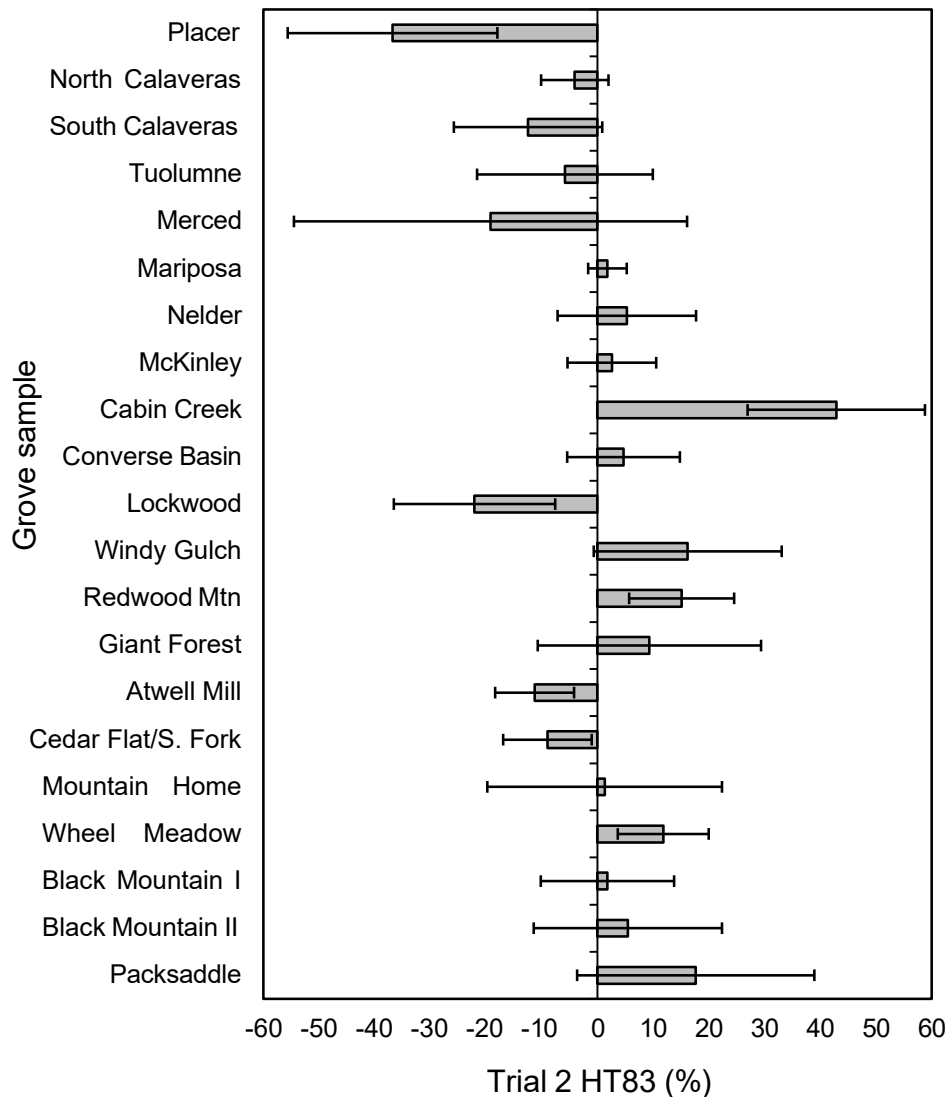

Figure S14. Trial 2 SEGI steckling grove sample mean height (HT83) in percent above or below the steckling mean after three growing seasons at the Foresthill Seed Orchard as of 1983. Error bars are relative standard errors of the grove sample mean, where the grove sample standard error is divided by the mean and expressed as a percent (%). Grove samples are arranged from north to south in the figure.



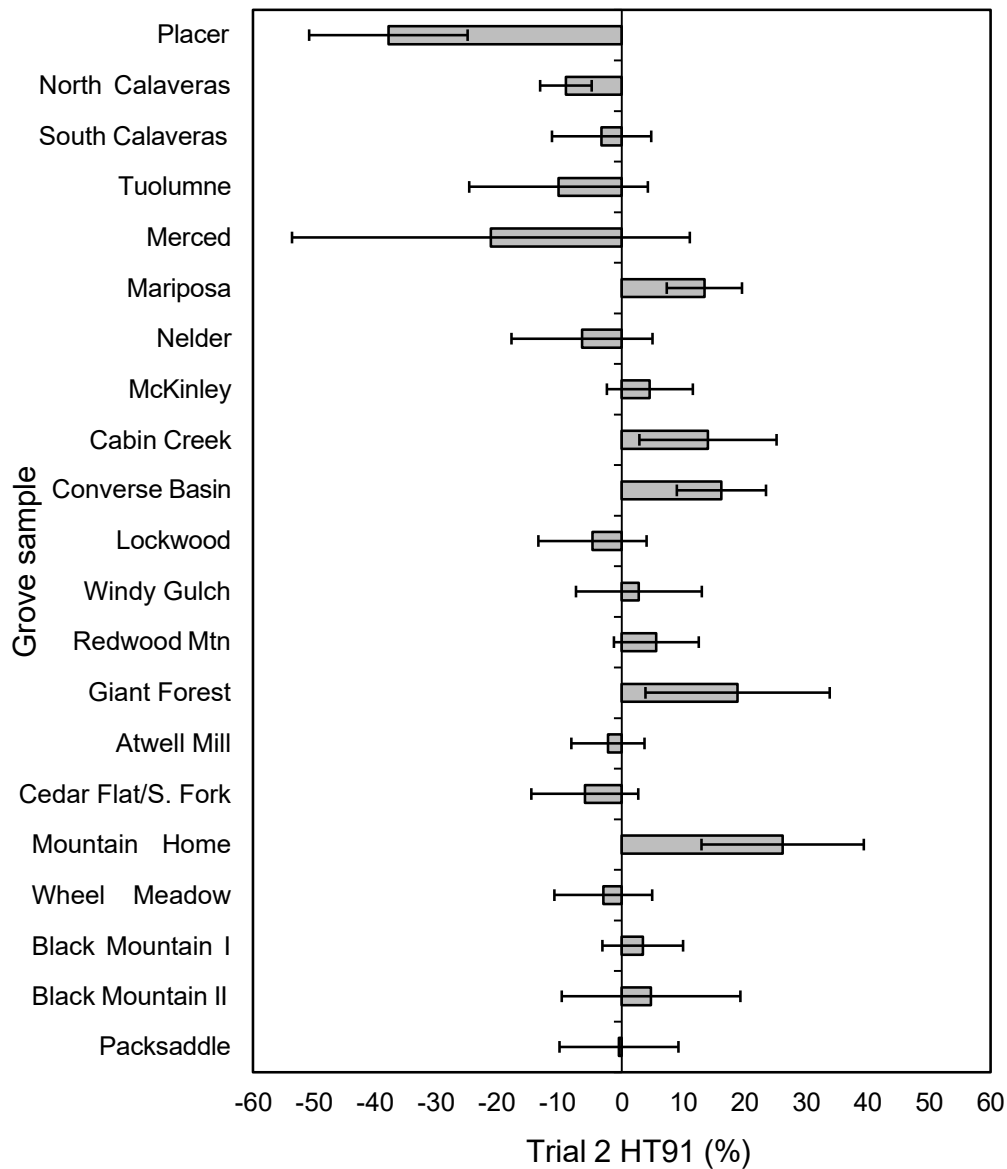

Figure S15. Trial 2 SEGI steckling grove sample mean height (HT91) in percent above or below the steckling mean after three growing seasons at the Foresthill Seed Orchard as of 1991. Error bars are relative standard errors of the grove sample mean, where the grove sample standard error is divided by the mean and expressed as a percent (%). Grove samples are arranged from north to south in the figure.

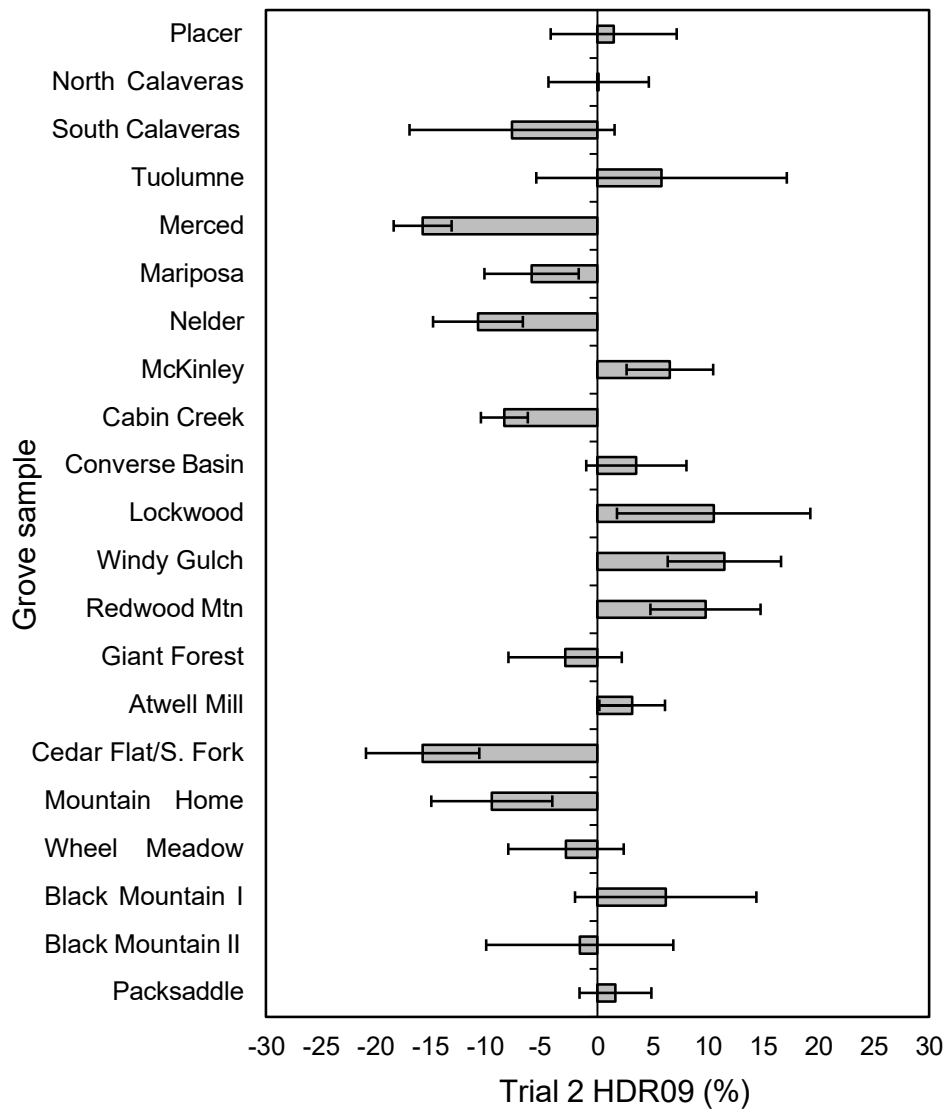

Figure S161. Trial 2 SEGI steckling grove sample mean height–diameter ratio (HDR09) in percent above or below the overall mean after 29 growing seasons at the Foresthill Seed Orchard. Error bars are relative standard errors (%). Error bars are relative standard errors of the grove sample mean, where the grove sample standard error is divided by the mean and expressed as a percent (%). Grove samples are arranged from north to south in the figure.

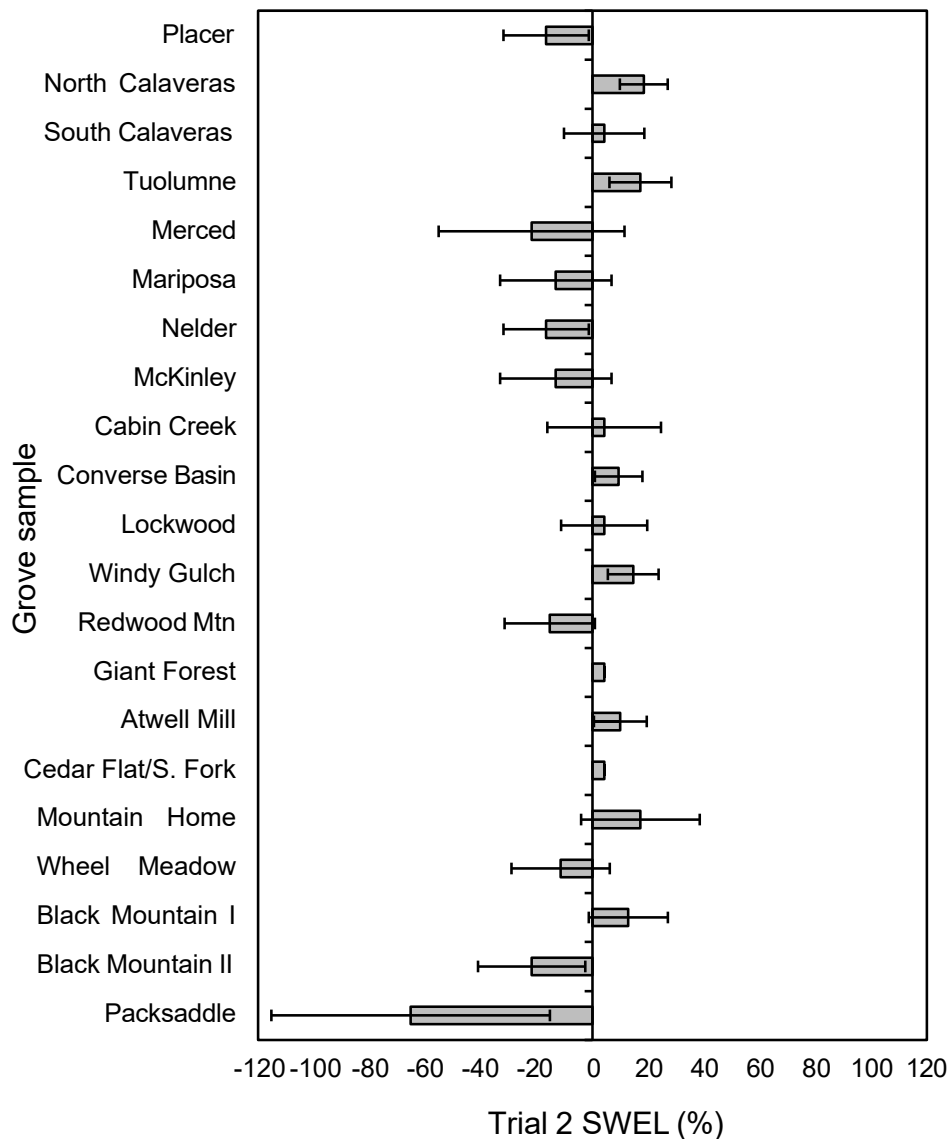

Figure S17. Trial 2 SEGI steckling grove sample mean basal swelling (SWEL) in percent above or below the within-trial steckling mean at Foresthill Seed Orchard. Error bars are relative standard errors of the grove sample mean, where the grove sample standard error is divided by the mean and expressed as a percent (%). Grove samples are arranged from north to south in the figure.

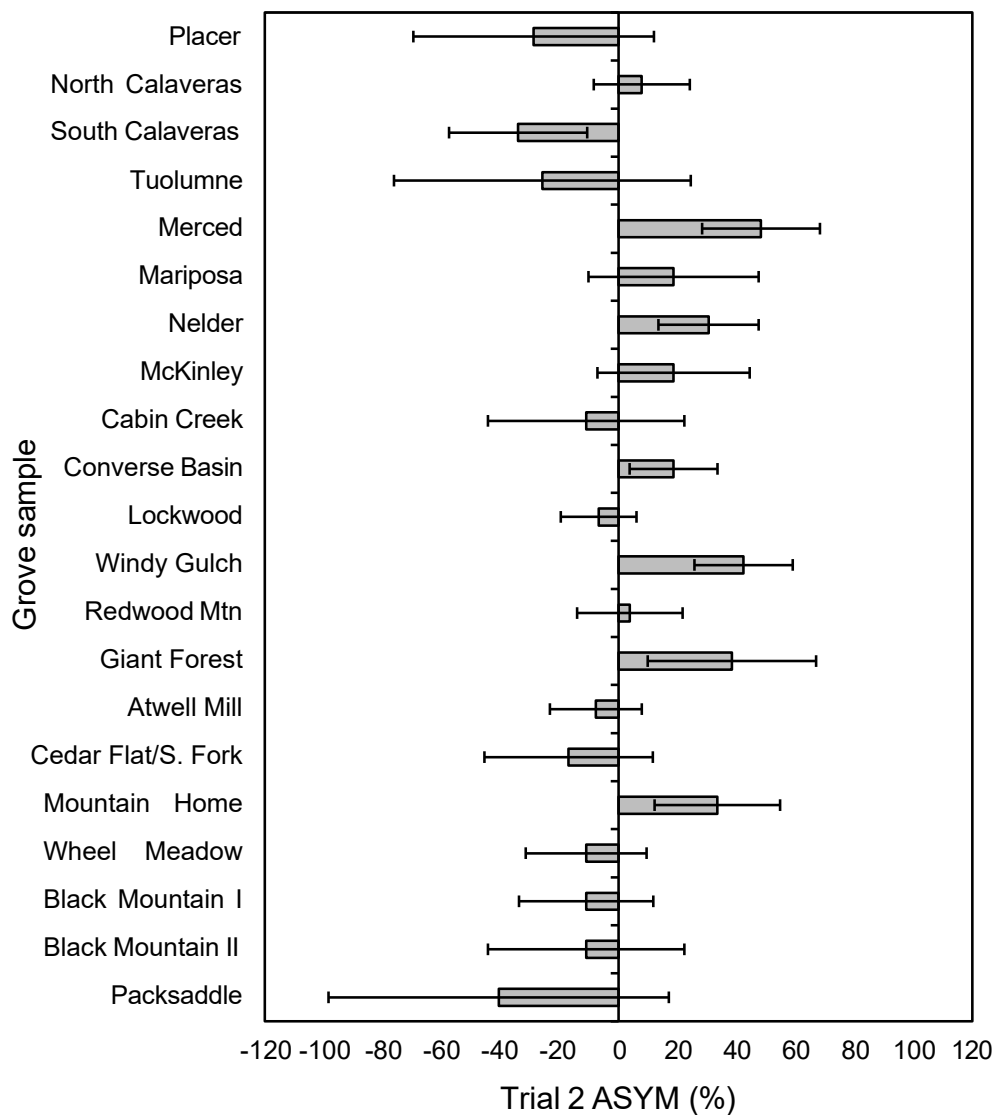

Figure S18. Trial 2 SEGI steckling grove sample mean lower stem asymmetry (ASYM) in percent above or below the within-trial steckling mean at the Foresthill Seed Orchard. Error bars are relative standard errors of the grove sample mean, where the grove sample standard error is divided by the mean and expressed as a percent (%). Grove samples are arranged from north to south in the figure.

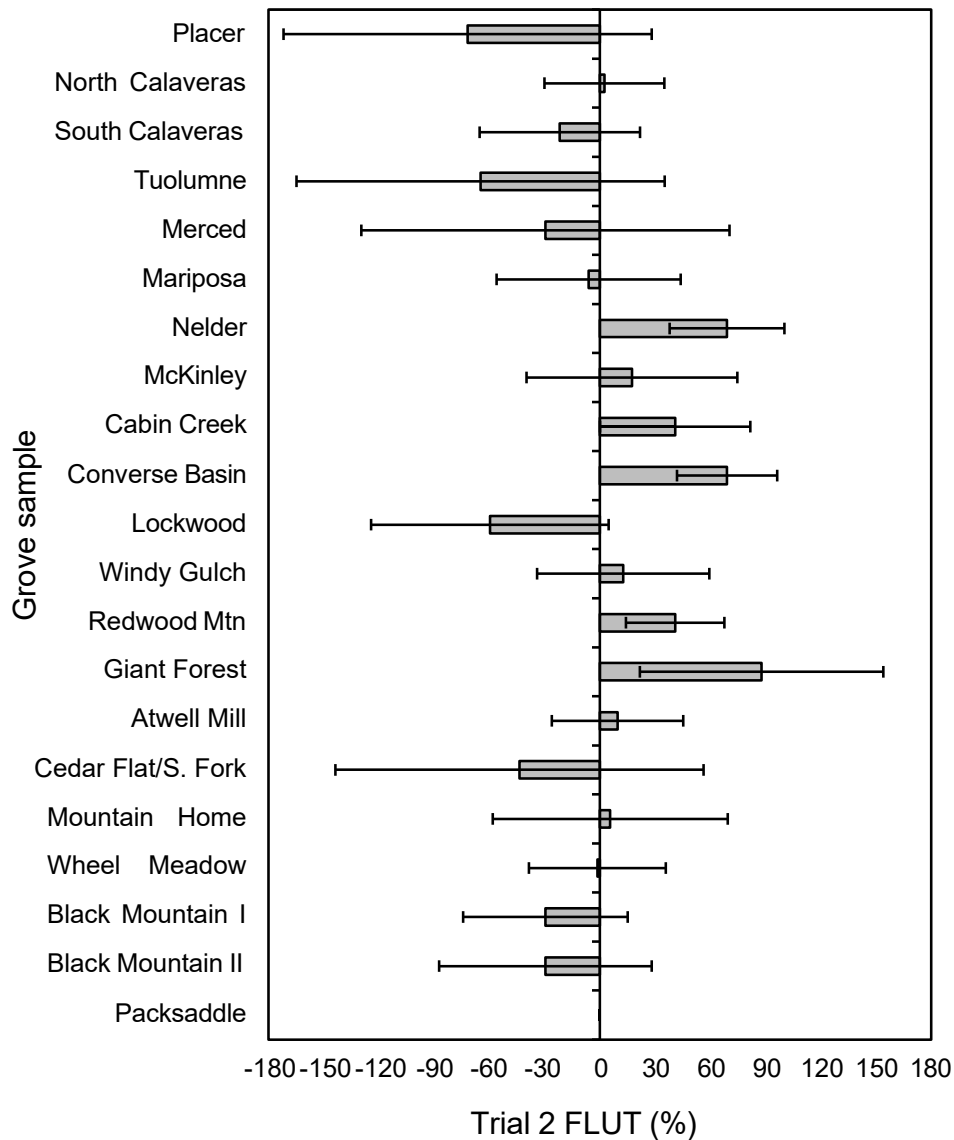

Figure S19. Trial 2 SEGI steckling grove sample mean lower stem fluting (FLUT) in percent above or below the within-trial steckling mean at the Foresthill Seed Orchard. Packsaddle had no observed fluting. Error bars are relative standard errors of the grove sample mean, where the grove sample standard error is divided by the mean and expressed as a percent (%). Grove samples are arranged from north to south in the figure.

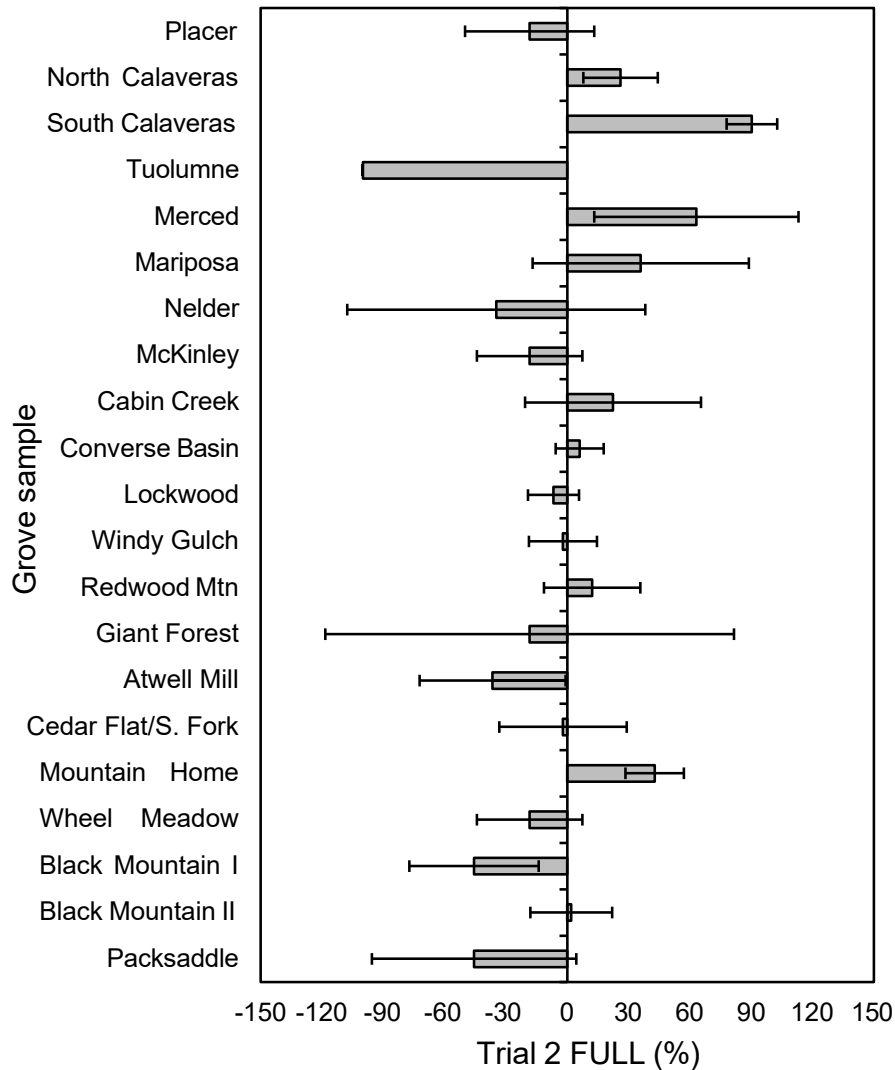

Figure S20. Trial 2 SEGI steckling grove sample mean crown fullness (FULL) in percent above or below the within-trial steckling mean at Foresthill Seed Orchard. Among-grove differences were statistically significant ( $p \leq 0.05$ ) in a Kruskal–Wallis nonparametric test. Placer and Deer Creek grove samples were not included in the analysis. Error bars are relative standard errors of the grove sample mean, where the grove sample standard error is divided by the mean and expressed as a percent (%). Grove samples are arranged from north to south in the figure.

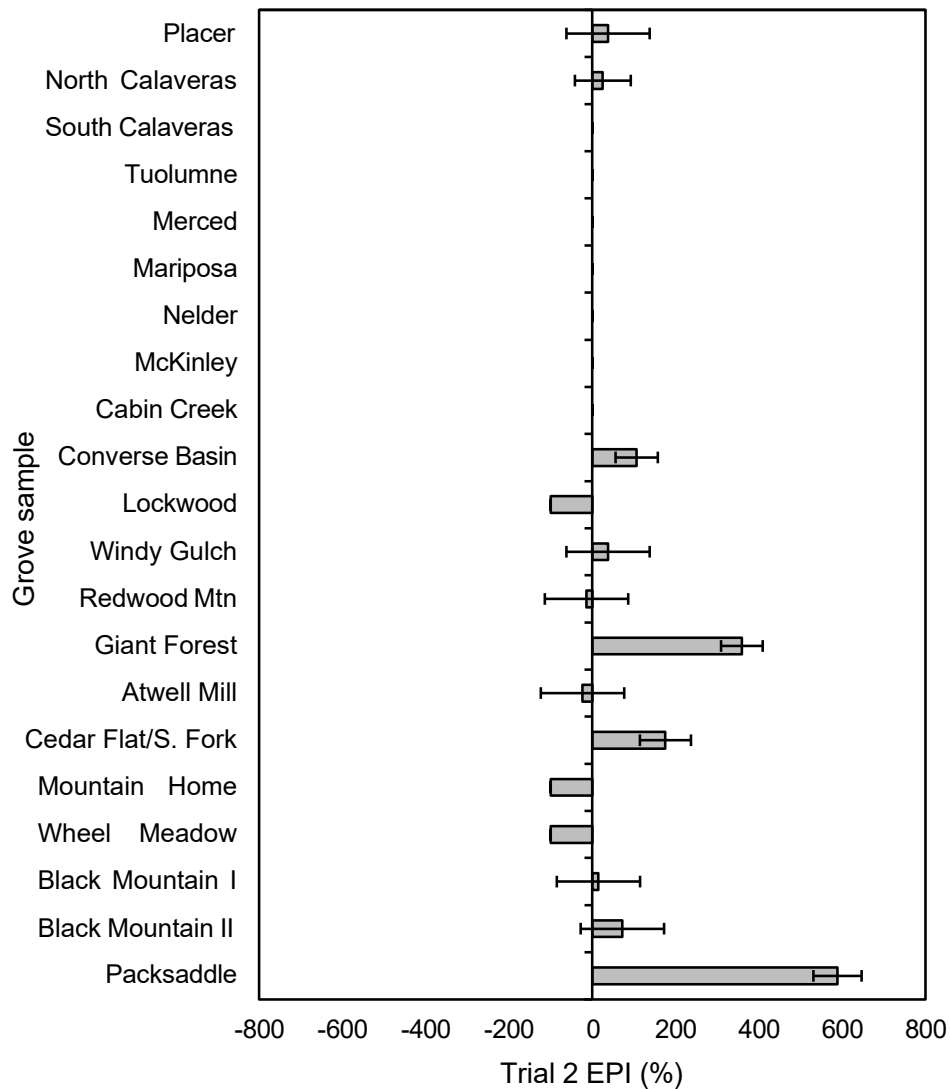

Figure S21. Trial 2 SEGI steckling grove sample mean epicormic sprout abundance (EPI) in percent above or below the within-trial steckling mean at the Foresthill Seed Orchard. Among-grove differences were statistically significant ( $p \leq 0.1$ ) in a Kruskal–Wallis test at  $\alpha = 0.1$ . Error bars are relative standard errors of the grove sample mean, where the grove sample standard error is divided by the mean and expressed as a percent (%). Grove samples are arranged from north to south in the figure.

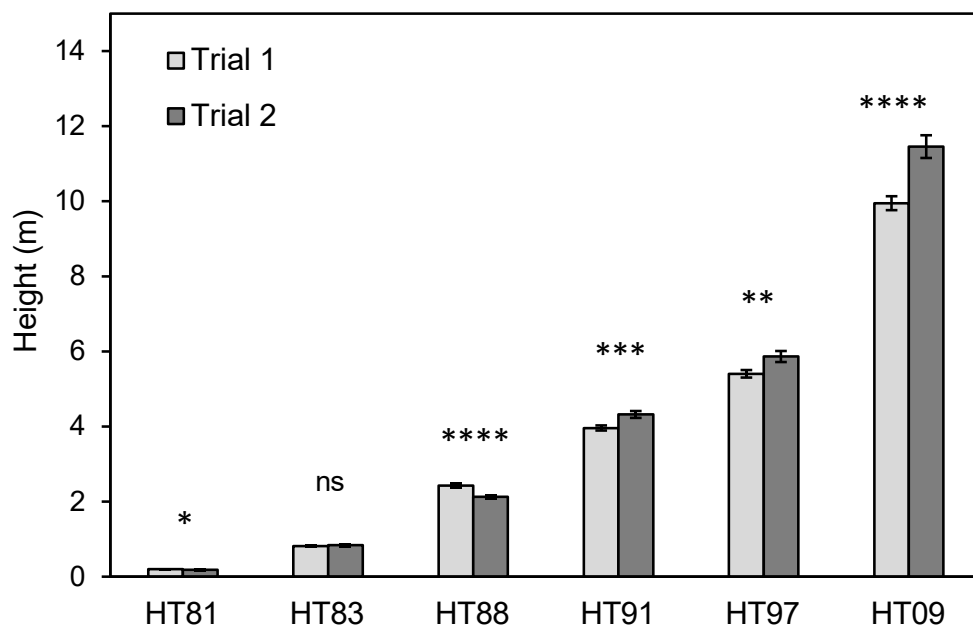

Figure S22. Mean height (HT) of SEGI stecklings in trial 1 (n = 235) and trial 2 (n = 124) in six measurement years over 29 growing seasons at the Foresthill Seed Orchard. Tests of significance were conducted using the nonparametric Kruskal–Wallis test. Trial 1 mean HT81 was significantly greater than trial 2. Levels of significance for each growth period are indicated by asterisks (ns = no significance, \* p < 0.05; \*\* p < 0.001; \*\*\*p < 0.001; and \*\*\*\* p < 0.0001).



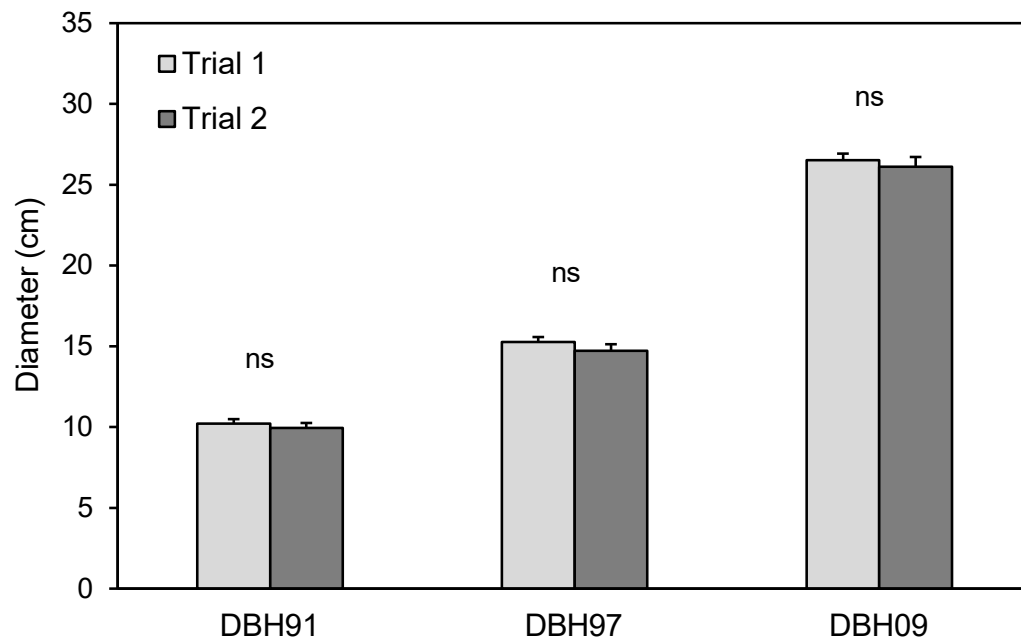

Figure S23. Mean diameter breast height (DBH) of SEGI stecklings in trial 1 and trial 2 in three measurement years over 29 growing seasons at the Foresthill Seed Orchard. Tests of significance were conducted using the nonparametric Kruskal–Wallis test, where ns = no significance at the 0.05 level.

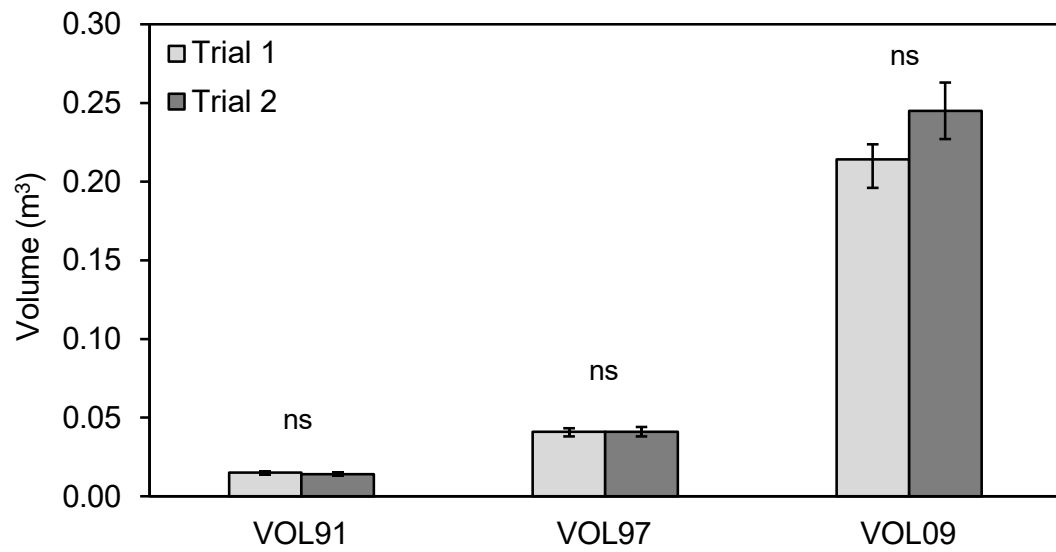

Figure S24. Mean conic stem volume (VOL) in SEGI stecklings in trial 1 and trial 2 in three measurement years over 29 growing seasons at the Foresthill Seed Orchard. Tests of significance were conducted using the nonparametric Kruskal–Wallis test, where ns = no significance at the 0.05 level.

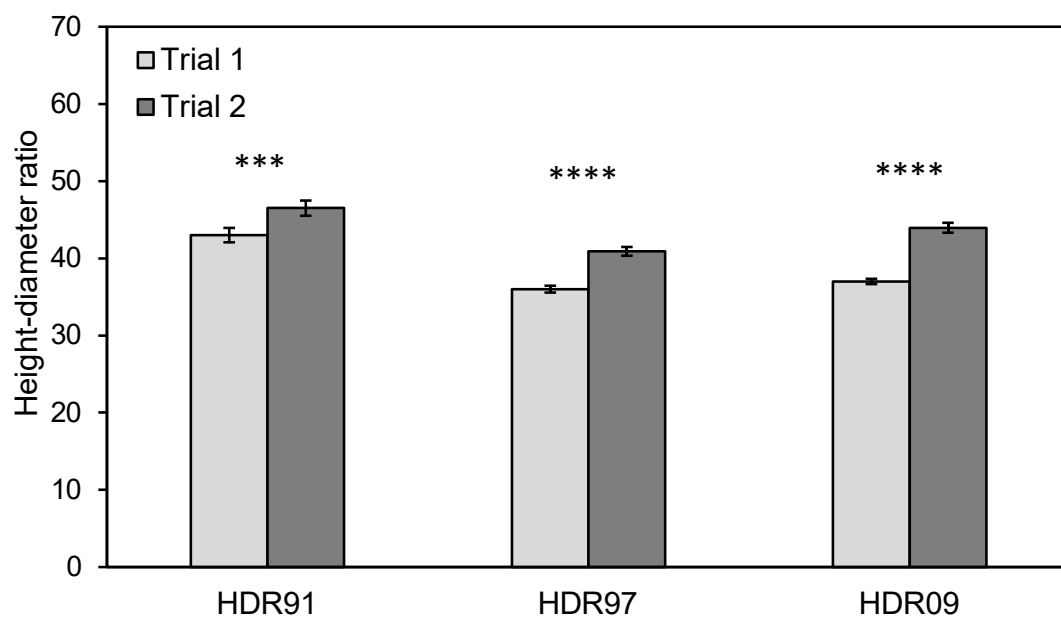

Figure S25. Mean height–diameter ratio (HDR) of SEGI stecklings in trial 1 and trial 2 in three measurement years over 29 growing seasons at the Foresthill Seed Orchard. Tests of significance were conducted using the nonparametric Kruskal–Wallis test. Levels of significance for each growth period are indicated by asterisks (ns = no significance; \*  $p < 0.05$ ; \*\*  $p < 0.01$ ; \*\*\*  $p < 0.001$ ; and \*\*\*\*  $p < 0.0001$ ).

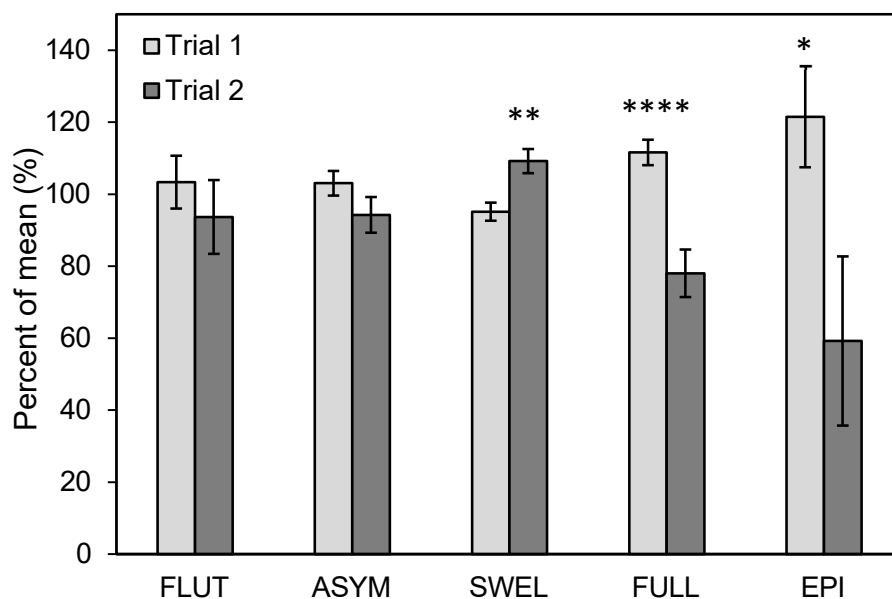

Figure S26. Comparison of trial 1 (n = 235) and trial 2 (n = 124) SEGI steckling form traits in percent of the mean after 29 growing seasons at the Foresthill Seed Orchard. Tests of significance were conducted using the non-parametric Kruskal–Wallis test. Error bars are relative standard errors of the trial mean where the trial standard error is divided by the mean and expressed as a percent. Levels of significance for each growth period are indicated by asterisks (\* p < 0.05; \*\* p < 0.01; \*\*\*p < 0.001; and \*\*\*\* p < 0.0001).

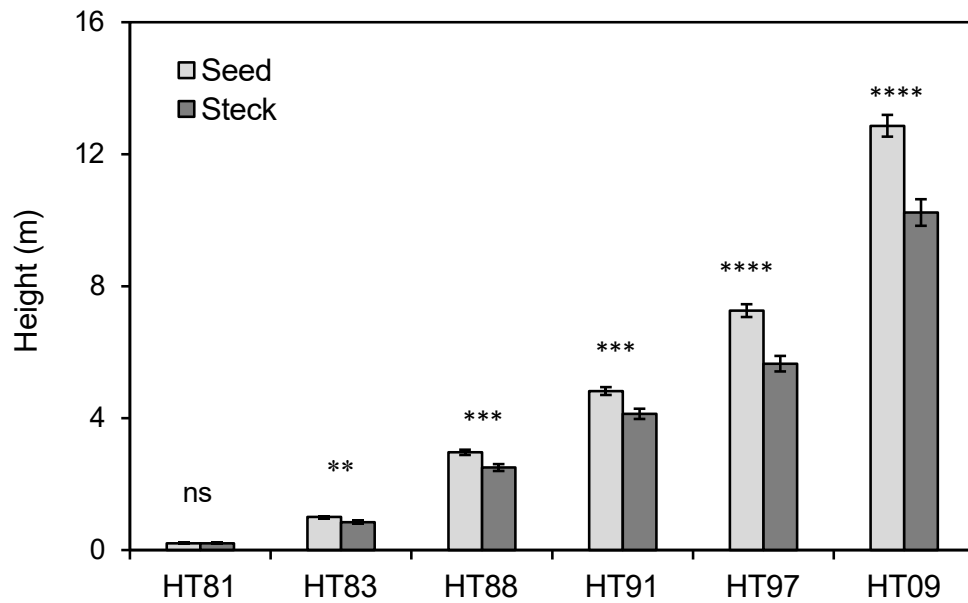

Figure S27. Trial 1 seedling (Seed;  $n = 68$ ) and steckling (Steck;  $n = 63$ ) height in six measurement years over 29 growing seasons at the Foresthill Seed Orchard. Only grove samples with both seedlings and stecklings planted in trial 1 were included in this analysis. Tests of significance were conducted using the nonparametric Kruskal–Wallis test. Levels of significance for each growth period are indicated by asterisks (ns = no significance; \*  $p < 0.05$ ; \*\*  $p < 0.01$ ; \*\*\*  $p < 0.001$ ; and \*\*\*\*  $p < 0.0001$ ).

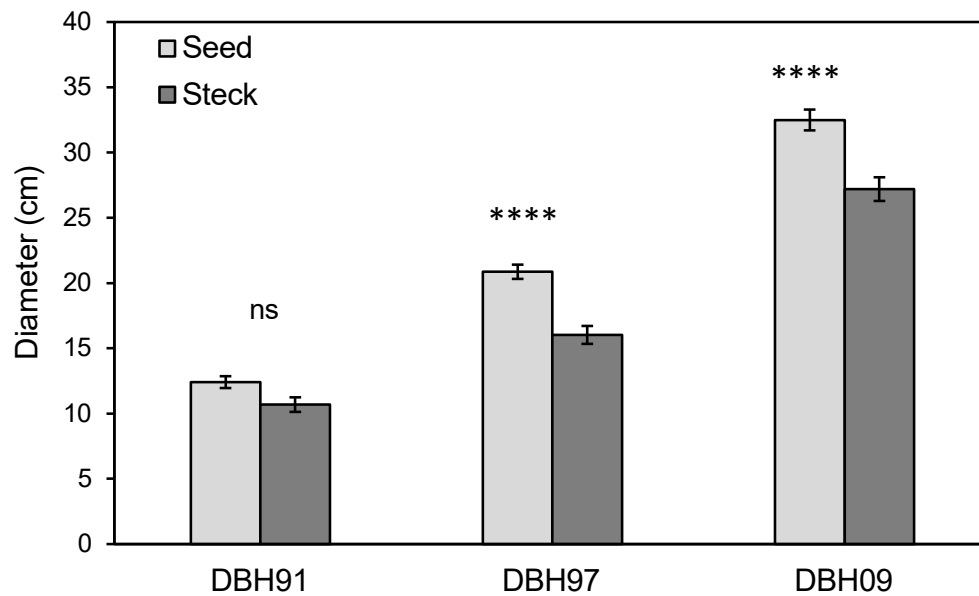

Figure S28. Trial 1 seedling (Seed;  $n = 68$ ) and steckling (Steck;  $n = 63$ ) stem diameter in six measurement years over 29 growing seasons at the Foresthill Seed Orchard. Only grove samples with both seedlings and stecklings planted in trial 1 were included in this analysis. Tests of significance were conducted using the nonparametric Kruskal–Wallis test. Levels of significance for each growth period are indicated by asterisks (ns = no significance; \*  $p < 0.05$ ; \*\*  $p < 0.01$ ; \*\*\*  $p < 0.001$ ; and \*\*\*\*  $p < 0.0001$ ).

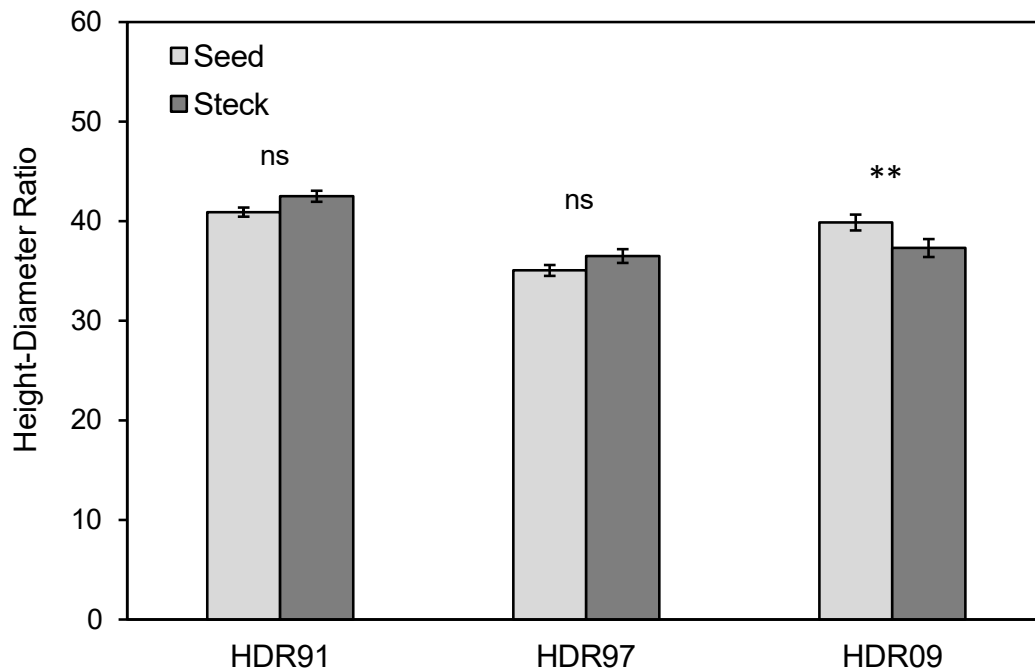

Figure S29. Trial 1 seedling (Seed;  $n = 68$ ) and steckling (Steck;  $n = 63$ ) height–diameter ratio for three measurement years from 1991 to 2009 at Foresthill Seed Orchard. Only grove samples with both seedlings and stecklings were included in this analysis. Tests of significance were conducted using the nonparametric Kruskal–Wallis test. Levels of significance for each growth period are indicated by asterisks (ns = no significance; \*  $p < 0.05$ ; \*\*  $p < 0.01$ ; \*\*\*  $p < 0.001$ ; and \*\*\*\*  $p < 0.0001$ ).
